# Supplementary material for: Trends in the diagnosis of diseases of despair in the United States, 2009–2018: a retrospective cohort study
Source: PubMed Central journal article supplement — BMJ Open. 2020 Nov 9;10(10):e037679. doi: 10.1136/bmjopen-2020-037679 (PMC7654125; doi:10.1136/bmjopen-2020-037679), 2020-11-09
Supplement: bmjopen-2020-037679.draft_revisions.pdf [file bmjopen-2020-037679.draft_revisions.pdf]

# BMJ Open

BMJ Open is committed to open peer review. As part of this commitment we make the peer review history of every article we publish publicly available.

When an article is published we post the peer reviewers' comments and the authors' responses online. We also post the versions of the paper that were used during peer review. These are the versions that the peer review comments apply to.

The versions of the paper that follow are the versions that were submitted during the peer review process. They are not the versions of record or the final published versions. They should not be cited or distributed as the published version of this manuscript.

BMJ Open is an open access journal and the full, final, typeset and author-corrected version of record of the manuscript is available on our site with no access controls, subscription charges or pay-per-view fees (<http://bmjopen.bmj.com>).

If you have any questions on BMJ Open's open peer review process please email [info.bmjopen@bmj.com](mailto:info.bmjopen@bmj.com)

# BMJ Open

## Trends in the Diagnosis of Diseases of Despair, 2009 - 2018

|                               |                                                                                                                                                                                                                                                                                                                                                                                                                                                                                                                                                  |
|-------------------------------|--------------------------------------------------------------------------------------------------------------------------------------------------------------------------------------------------------------------------------------------------------------------------------------------------------------------------------------------------------------------------------------------------------------------------------------------------------------------------------------------------------------------------------------------------|
| Journal:                      | <i>BMJ Open</i>                                                                                                                                                                                                                                                                                                                                                                                                                                                                                                                                  |
| Manuscript ID                 | bmjopen-2020-037679                                                                                                                                                                                                                                                                                                                                                                                                                                                                                                                              |
| Article Type:                 | Original research                                                                                                                                                                                                                                                                                                                                                                                                                                                                                                                                |
| Date Submitted by the Author: | 13-Feb-2020                                                                                                                                                                                                                                                                                                                                                                                                                                                                                                                                      |
| Complete List of Authors:     | Brignone, Emily; Highmark Blue Cross Blue Shield, Data Science Research and Development<br>George, Daniel; Penn State College of Medicine<br>Sinoway, Lawrence; Penn State College of Medicine<br>Katz, Curren; Highmark Blue Cross Blue Shield, Data Science Research and Development<br>Sauder, Charity; Penn State College of Medicine<br>Murray, Andrea; Penn State College of Medicine<br>Gladden, Robert; Highmark Blue Cross Blue Shield, Data Science Research and Development<br>Kraschnewski, Jennifer; Penn State College of Medicine |
| Keywords:                     | EPIDEMIOLOGY, Risk management < HEALTH SERVICES ADMINISTRATION & MANAGEMENT, MENTAL HEALTH, PREVENTIVE MEDICINE, PUBLIC HEALTH, SOCIAL MEDICINE                                                                                                                                                                                                                                                                                                                                                                                                  |
|                               |                                                                                                                                                                                                                                                                                                                                                                                                                                                                                                                                                  |

SCHOLARONE™  
Manuscripts

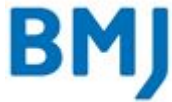

I, the Submitting Author has the right to grant and does grant on behalf of all authors of the Work (as defined in the below author licence), an exclusive licence and/or a non-exclusive licence for contributions from authors who are: i) UK Crown employees; ii) where BMJ has agreed a CC-BY licence shall apply, and/or iii) in accordance with the terms applicable for US Federal Government officers or employees acting as part of their official duties; on a worldwide, perpetual, irrevocable, royalty-free basis to BMJ Publishing Group Ltd ("BMJ") its licensees and where the relevant Journal is co-owned by BMJ to the co-owners of the Journal, to publish the Work in this journal and any other BMJ products and to exploit all rights, as set out in our [licence](#).

The Submitting Author accepts and understands that any supply made under these terms is made by BMJ to the Submitting Author unless you are acting as an employee on behalf of your employer or a postgraduate student of an affiliated institution which is paying any applicable article publishing charge ("APC") for Open Access articles. Where the Submitting Author wishes to make the Work available on an Open Access basis (and intends to pay the relevant APC), the terms of reuse of such Open Access shall be governed by a Creative Commons licence – details of these licences and which [Creative Commons](#) licence will apply to this Work are set out in our licence referred to above.

Other than as permitted in any relevant BMJ Author's Self Archiving Policies, I confirm this Work has not been accepted for publication elsewhere, is not being considered for publication elsewhere and does not duplicate material already published. I confirm all authors consent to publication of this Work and authorise the granting of this licence.

## Trends in the Diagnosis of Diseases of Despair, 2009 - 2018

Emily Brignone, PhD<sup>1</sup>, Daniel George, PhD, MSc<sup>2</sup>, Lawrence Sinoway, MD<sup>2</sup>, Curren Katz, PhD<sup>1</sup>, Charity Sauder, MS<sup>2</sup>, Andrea Murray, MPH<sup>2</sup>, Robert Gladden, MA<sup>1</sup>, Jennifer Kraschnewski, MD, MPH<sup>2</sup>

<sup>1</sup> Highmark Health, Pittsburgh, PA, <sup>2</sup> Penn State University College of Medicine, Hershey, PA

### Contributorship statement:

Study concept and design: All authors

Acquisition, analysis, or interpretation of data: Brignone, George, Gladden, Katz, Kraschnewski, Sinoway

Drafting of the manuscript: Brignone, George, Kraschnewski

Critical revision of the manuscript for important intellectual content: All authors

Statistical analysis: Brignone

Administrative, technical, or material support: Murray, Sauder

Study supervision: Gladden, Sinoway

### Funding statement:

The project described was supported by the National Center for Advancing Translational Sciences, National Institutes of Health, through Grant UL1 TR002014 and administrative supplement UL1 TR002014-03S1. The content is solely the responsibility of the authors and does not necessarily represent the official views of the NIH.

### Competing interests statement:

The authors have no competing interests to disclose.

### Acknowledgements:

Jonathon Johnson, MA, MS, Center for Rural Pennsylvania

### Corresponding Author:

Emily Brignone, PhD

120 Fifth Avenue

Pittsburgh, PA 15222

(801)-897-3247

[emily.brignone@highmarkhealth.org](mailto:emily.brignone@highmarkhealth.org)

## Abstract

**Objective:** Increasing mortality and decreasing life expectancy in the U.S. are largely attributable to accidental overdose, alcohol-related disease, and suicide. These “deaths of despair,” often follow years of morbidity, yet little is known about trends in the clinical recognition of “diseases of despair”. The objective of this study is to characterize rates of clinically documented diseases of despair over the last decade and identify sociodemographic risk factors.

**Design:** Retrospective study using a healthcare claims database with 10 years of follow-up.

**Setting:** Participants resided nationwide but were concentrated in U.S. states disproportionately affected by deaths of despair, including Pennsylvania, West Virginia, and Delaware.

**Participants:** Cohort included 12,144,252 participants, with no restriction by age or gender.

**Outcome Measures:** Diseases of despair were defined as diagnoses related to alcohol misuse, substance misuse, and suicide ideation/behaviors. A lookback period was used to identify incident diagnoses. Annual and all-time incidence/prevalence estimates were computed, along with risk for current diagnosis.

**Results:** 515,830 participants received a disease of despair diagnosis (58.5% male, median 36 years). From 2009-2018, the prevalence of alcohol-, substance-, and suicide-related diagnoses respectively increased by 37%, 94%, and 170%. Ages 55-74 had the largest increase in alcohol/substance related diagnoses (59% and 172%). Ages <18 had the largest increase in suicide-related diagnoses (287%). Overall, odds for current-year diagnosis were higher among men (Adjusted Odds Ratio [AOR] = 1.49, 95% CI=1.47-1.51), and among those with Affordable Care Act or Medicare coverage relative to commercial coverage (AOR=1.30, 1.24-1.37; AOR=1.51, 1.46-1.55).

**Conclusions:** Increasing clinical rates of disease of despair diagnoses largely mirror broader societal trends in mortality. While the opioid crisis remains a top public health priority, parallel rises in alcohol-related diagnoses and suicidality must be concurrently addressed. Findings suggest opportunities for healthcare systems and providers to deploy targeted prevention to mitigate the progression of morbidities toward mortality.

1  
2  
3 84 **Strengths and limitations of this study:**  
4

- 5 85
- 6 86 • Increasing mortality due to deaths of despair is well documented in extant research. To  
7 87 our knowledge, this study is the first to provide large-scale insights into the clinical  
8 88 recognition of the morbidities that can ultimately culminate in those deaths. This clinical  
9 89 perspective highlights potential opportunities to intervene in the progression of morbidity  
10 90 toward mortality.
  - 11 91
  - 12 92 • The study uses a large and inclusive sample. As a result, we are able to identify  
13 93 differential patterns in the diagnosis of substance-, alcohol-, and suicide-related diagnoses  
14 94 across age and gender lines, which can improve targeted prevention efforts.
  - 15 95
  - 16 96 • The long administrative surveillance period of 10 years allows us to track changes in the  
17 97 identification of diseases of despair over time, and to compare long-term trends between  
18 98 documented morbidity and mortality.
  - 19 99
  - 20 100 • While trends in deaths of despair appear to vary by race/ethnicity, details on  
21 101 race/ethnicity were not available for our sample.
  - 22 102
  - 23 103 • We were unable to directly link disease of despair incidence/prevalence to mortality on  
24 104 an individual level; rather, we compare trends in morbidity and mortality in more general  
25 105 terms.  
26 106  
27 107  
28 108  
29 109  
30 110  
31 111  
32 112  
33 113  
34 114  
35 115  
36 116  
37 117  
38 118  
39 119  
40 120  
41 121  
42 122  
43 123  
44 124  
45 125  
46 126  
47 127  
48 128
- 49  
50  
51  
52  
53  
54  
55  
56  
57  
58  
59  
60

1  
2  
3 129 From 2015-2017, there has been an annual downward trend in life expectancy in the  
4  
5 130 United States, the longest sustained decline since 1915-1918.<sup>1,2</sup> Relatedly, researchers have  
6  
7  
8 131 observed a longer, more marked increase in the all-cause mortality of middle-aged white non-  
9  
10 132 Hispanic men and women in the US between 1999 and 2015, with premature deaths largely  
11  
12 133 associated with “deaths of despair,” including suicides, accidental poisonings (e.g. opiate  
13  
14 134 overdose), and alcohol-related liver disease (e.g. cirrhosis).<sup>3,4</sup>

15  
16  
17 135 This troubling observation has coincided with decades of economic decline for less  
18  
19 136 educated and unskilled workers, stagnant or falling real median wages and family incomes,<sup>5,6</sup>  
20  
21 137 lower marriage rates,<sup>7</sup> increases in single-parent households,<sup>8</sup> and disengagement from the labor  
22  
23 138 force.<sup>9</sup> It is theorized that these changes have fostered growing feelings of despair, i.e.,  
24  
25 139 disillusionment, precariousness, and resignation.<sup>3,4,10-12</sup> Despair may in turn trigger emotional,  
26  
27 140 cognitive, behavioral, and even biological changes,<sup>13-17</sup> increasing the likelihood of diseases that  
28  
29 141 can progress and ultimately culminate in these deaths of despair.  
30  
31

32  
33 142 While this pathway may unfold over years or decades, to date, most studies in this  
34  
35 143 domain have primarily focused on the endpoint of mortality. Limited extant research suggests a  
36  
37 144 parallel rise in associated morbidities,<sup>3,4</sup> but specific estimates of “disease of despair” morbidity  
38  
39 145 (i.e., substance-related disorders, alcohol-related disorders, and suicide ideation and attempts) are  
40  
41 146 lacking. Moreover, little is known about trends in the recognition and documentation of these  
42  
43 147 diseases in the clinical setting. This represents an important gap in the literature; indeed, while  
44  
45 148 primary prevention efforts to address the root causes of societal despair are needed, it may be  
46  
47 149 possible to intervene upon the pathway from morbidity to mortality in the clinical setting. An  
48  
49 150 understanding of diagnostic patterns and the association between documented morbidity and  
50  
51 151 mortality is necessary to guide these secondary and tertiary prevention efforts. Thus, the  
52  
53  
54  
55  
56  
57  
58  
59  
60

1  
2  
3 152 objectives of the present study were to use a large administrative database of healthcare claims to  
4  
5 153 1) characterize the incidence and prevalence of diseases of despair diagnoses over the last  
6  
7  
8 154 decade; 2) identify individual sociodemographic factors associated with disease of despair  
9  
10 155 diagnosis; and 3) discuss patterns in morbidity and mortality.

## 12 156 **Methods**

14  
15 157 This retrospective cohort study used claims data extracted from the administrative  
16  
17 158 databases of Highmark Inc., a large US-based health insurance company. Highmark members are  
18  
19 159 concentrated in states that have been disproportionately affected by deaths of despair, including  
20  
21 160 Pennsylvania, West Virginia, and Delaware.<sup>18,19</sup> The database contains clinical information such  
22  
23  
24 161 as services used and diagnoses assigned, and sociodemographic characteristics including gender,  
25  
26 162 age, home address, and insurance coverage details. The study cohort included 12 million  
27  
28 163 individuals who were enrolled in a Highmark health insurance plan between 2007 and 2018, and  
29  
30  
31 164 who had a valid age, gender, and home address on file. Over 98.5% of enrolled individuals met  
32  
33 165 inclusion criteria and were included in the final analytic cohort.

### 35 166 *Study Variables*

37  
38 167 Diseases of despair were defined as diagnoses related to alcohol use, substance use, and  
39  
40 168 suicide ideation/behaviors. International Classification of Diseases (ICD) codes were extracted  
41  
42 169 from claims and classified into variables indicating the presence or absence of a diagnosis within  
43  
44  
45 170 each of the three diagnostic categories of interest. Classifications were adapted from the  
46  
47 171 Healthcare Cost and Utilization Project Clinical Classification Software (HCUP-CCS).<sup>20</sup> Code  
48  
49 172 mappings were used for HCUP categories alcohol-related disorders (5.11), substance-related  
50  
51 173 disorders (5.12), and suicide and intentional self-inflicted injury (5.13). Diagnoses related to  
52  
53  
54 174 substance use considered outside the focus of the present study were excluded, specifically,



1  
2  
3 175 codes related to the use of tobacco and cannabis, and certain non-psychoactive substances (i.e.,  
4  
5 176 ICD-10 codes F550, F551, F552, F554). Additional indicators were created for overall disease of  
6  
7  
8 177 despair status (diagnosis of any type), and co-occurring diseases of despair status (diagnoses in  
9  
10 178 multiple categories). A two-year lookback period was used to identify incident diagnoses. If no  
11  
12 179 record of the given diagnosis type was found during the lookback period, the diagnosis was  
13  
14 180 recorded as an incident case. Annual and all-time incidence and prevalence estimates were  
15  
16  
17 181 computed.

### 182 *Insurance Coverage*

183 Insurance product information was recoded into the following categories: Employer  
184 sponsored; individual market Affordable Care Act (ACA) plans; Medicare, and Other. Product  
185 information was captured on an annual basis. If multiple products were found on file during a  
186 single year, the product covering the larger number of months was recorded.

187 To determine whether cohort members were at-risk for being diagnosed with a disease of  
188 despair at any given point, the months enrolled during each year of follow-up were recorded for  
189 all cohort members. Except for newborns, members were considered “enrolled” for a given year  
190 if at they were covered for at least 10 months out of the year. Newborns were considered  
191 enrolled if coverage was identified within the first 90 days of life.

### 192 **Data Analysis**

#### 193 *Incidence and Prevalence of Diseases of Despair*

194 Descriptive statistics were computed for all study variables both overall and stratified by  
195 diagnostic status (“any” versus “no” disease of despair diagnosis recorded over the course of  
196 follow-up). Differences were statistically compared using chi-square tests for categorical  
197 variables, and t-tests for continuous variables. Next, overall and gender- and age-specific

1  
2  
3 198 incidence and prevalence rates of disease of despair diagnosis were computed for years 2009  
4  
5 199 through 2018, allowing for an initial lookback period beginning in 2007. Rates were calculated  
6  
7 200 by dividing the number of newly identified cases by the number of members enrolled and with  
8  
9 201 no previous diagnosis in the past two years (incidence), and the number of current year cases by  
10  
11 202 number of members enrolled (prevalence).  
12  
13

14 203 The partially overlapping samples z-test<sup>21</sup> was used to statistically test if and the degree  
15  
16 204 to which rates of diseases of despair changed over the last decade. The partially overlapping test  
17  
18 205 is designed for the statistical comparison of proportions when data include a combination of  
19  
20 206 paired and unpaired samples, as is often the case in dynamic cohorts extracted from clinical  
21  
22 207 databases.  
23  
24  
25

#### 26 208 *Predicting Individual-level Risk for Diseases of Despair*

27

28 209 To identify factors associated with individual-level risk for disease of despair diagnosis  
29  
30 210 during the most recent year of follow-up (2018), logistic regression was used to estimate risk for  
31  
32 211 diagnosis as a function of demographic and enrollment characteristics. Odds ratios and their 95%  
33  
34 212 confidence intervals were computed for all estimates. Analyses were performed using R, version  
35  
36 213 3.5.2<sup>22</sup> within Highmark's secure computing environment.  
37  
38  
39

#### 40 214 *Patient and Public Involvement*

41

42 215 Patients or the public were not involved in the design, conduct, reporting, or  
43  
44 216 dissemination plans of this research. The study was approved by the Institutional Review Boards  
45  
46 217 of [blinded]. Informed consent was waived, as no study participants were contacted. Due to  
47  
48 218 privacy laws, data cannot be made publicly available.  
49  
50

51 219

## 54 220 **Results**

55  
56  
57  
58  
59  
60

221 Overall, 4.2% of cohort members (N = 515,830) were diagnosed with at least one disease of  
222 despair at some point during follow-up. Among these, 54.0% were diagnosed with an alcohol-  
223 related disorder, 44.2% with a substance-related disorder, and 16.3% with suicide  
224 ideation/behaviors; multiple types of diseases of despair diagnoses were recorded for 12.9%.  
225 Additional cohort description is presented in **Table 1**.

[TABLE 1]

227 Age and gender-specific diagnostic prevalence rates from 2009 to 2018 are presented in  
228 **Figure 1**. Aggregate incidence and prevalence rates and statistical comparisons between 2009  
229 and 2018 are discussed in the following sections. Age- and gender-stratified statistics are  
230 presented in **Tables 2 and 3**.

[FIGURE 1, TABLES 1 AND 2]

#### 232 *Any Disease of Despair Diagnosis*

233 Between 2009 and 2018, the annual diagnostic incidence of diseases of despair increased  
234 by 44%, and the diagnostic prevalence increased by 68%. Significant increases were seen for  
235 both men and women across every age group, although the magnitude of increases varied along  
236 age and gender lines. While percentage point increases tended to be smaller among women  
237 compared to men, relative increases tended to be larger among women.

#### 238 *Alcohol-related Diagnosis*

239 The overall incidence and prevalence of alcohol-related diagnosis increased by 23% and  
240 37%, respectively. Significant increases were seen for men and women ages 18 and above, but  
241 significant decreases were seen for those ages 1-17. The most dramatic increases were seen  
242 among those ages 55-74; their prevalence increased by .5% percentage points (59% relative  
243 increase).

### 244 *Substance-related Diagnosis*

245 The overall incidence and prevalence of substance-related diagnosis increased by 48%  
246 and 94%, respectively. As with the trends observed for alcohol-related diagnoses, the incidence  
247 and prevalence of substance-related diagnoses increased for all groups except for those ages 1-  
248 17; for this group, rates significantly decreased. Relative increases were again highest for those  
249 ages 55-57 (prevalence 172% higher; .5% percentage point increase), and for infants (prevalence  
250 114% higher; .25% percentage point increase).

### 251 *Suicide Ideation / Behaviors Diagnosis*

252 The incidence and prevalence of suicide-related diagnosis increased for all relevant age  
253 groups (infants were excluded) by 149% and 170%, respectively. While the absolute rates of  
254 suicide-related diagnosis were lower than other types of disease of despair diagnoses, the relative  
255 increases were dramatic. Among those ages 1-17, the prevalence increased by 287%. Among  
256 those ages 18-34, it increased by 210%. All other age groups saw a relative increase of at least  
257 70%.

### 258 *Logistic Regression Results*

259 Results of logistic regression models predicting the odds for 2018 disease of despair  
260 diagnoses as a function of individual and enrollment characteristics are presented in **Table 4**.

261 [TABLE 4]

262 Men had higher odds than women of having any type of disease of despair diagnosis, alcohol-  
263 related diagnosis, and substance-related diagnosis (AOR [adjusted odds ratio] = 1.49, 2.35, and  
264 1.23, respectively), but lower odds than women for suicide ideation/behaviors (AOR = 0.72).  
265 Age was also significantly associated with risk for all four disease of despair outcomes. After  
266 adjusting for gender and insurance type, individuals ages 18-35 had the highest risk for any

1  
2  
3 267 disease of despair, substance-related diagnosis, and suicide-related diagnosis. For alcohol-related  
4  
5 268 disorders, those ages 35-74 were at slightly higher risk than those ages 18-34, and much higher  
6  
7  
8 269 risk than any other group. Finally, type of enrollment was also significantly related to risk.  
9  
10 270 Compared to commercial insurance plans, Affordable Care Act (ACA) plans were associated  
11  
12 271 with approximately 1.3 times higher odds for any diagnosis, alcohol-related diagnosis, and  
13  
14 272 substance-related diagnosis, but similar risk for suicide-related diagnoses. Medicare plans were  
15  
16  
17 273 associated with 1.5 times higher odds for any disease of despair and each of the three diagnostic  
18  
19 274 subtypes (AOR range was 1.3 – 2.2).

## 21 275 **Discussion**

22  
23  
24 276 Nearly one in twenty individuals in our sample were clinically diagnosed with a disease  
25  
26 277 of despair between 2007 and 2018. Similar to observed despair-related mortality, diseases of  
27  
28 278 despair have significantly increased as morbidities over the past decade. Tracking with the  
29  
30  
31 279 original finding that deaths of despair have disproportionately affected middle-aged men,<sup>3</sup> our  
32  
33 280 data showed the largest absolute increases in overall prevalence for men ages 35-74, followed by  
34  
35 281 women ages 55-74 and 18-34. These findings reinforce the notion that while the opioid crisis  
36  
37  
38 282 remains a top public health priority, parallel rises in alcohol-related diagnoses and suicidality  
39  
40 283 must be concurrently addressed.

41  
42 284 The relative increases in specific diagnoses seen in infants, youth, and young adults were  
43  
44 285 also striking. Among infants, the prevalence of substance-related diagnoses doubled over the  
45  
46  
47 286 course of follow-up. This increase was entirely attributable to neonatal abstinence syndrome and  
48  
49 287 corresponds closely with increases in substance-related disorders among women of childbearing  
50  
51 288 age. Neonatal abstinence syndrome could be argued to be the direct result of a disease of despair  
52  
53  
54 289 among mothers, and therefore, was included. In addition, the prevalence of suicide ideation and  
55  
56  
57  
58  
59

1  
2  
3 290 behaviors among youth and young adults at least tripled over the course of follow-up. These  
4  
5 291 findings underscore the importance of targeting vulnerable subpopulations in tailored prevention  
6  
7 292 and early intervention services. A recent study by Gaydos et al. used nationally representative  
8  
9 293 longitudinal data to examine diseases of despair and their age patterns from adolescence through  
10  
11 294 the late-30s from 1994-2017.<sup>23</sup> This study demonstrated increases as the cohort aged into their  
12  
13 295 late 30s, across racial and ethnic groups as well as geographic locales. In addition to broadening  
14  
15 296 original views beyond impacting whites in rural locales, the generalized increases in despair  
16  
17 297 documented among this younger cohort forewarn further likely increases in mid-life mortality in  
18  
19 298 the coming decades.

20  
21  
22  
23  
24 299 The concept of despair, itself, remains largely unstudied, with manifestations in  
25  
26 300 cognitive, emotional, behavioral, and biological domains as well as in social and political-  
27  
28 301 economic contexts.<sup>17</sup> For example, Gleit et al characterized despair by social and psychological  
29  
30 302 dysfunction such as a lack of purpose in life, a sense of worthlessness, little hope or goals for the  
31  
32 303 future, and perceived social rejection by broader society.<sup>5</sup> Shanahan et. al provided a roadmap  
33  
34 304 for studying the social contexts that can further strengthen or weaken pathways to despair.  
35  
36 305 Ultimately, improving the ability to measure and clinically screen for despair, as opposed to  
37  
38 306 resultant diseases or deaths, will allow us to best intervene. Definitively addressing despair  
39  
40 307 requires tackling the root causes (i.e. deep structural forces that perpetuate socioeconomic  
41  
42 308 disadvantage) for which there are no quick fixes.<sup>24</sup>

43  
44  
45  
46  
47 309 By definition, diagnoses of diseases of despair and health insurance enrollment imply  
48  
49 310 access to health care, although it is clear additional barriers to treatment exist. Insurance type is  
50  
51 311 an important predictor of disease diagnoses, and diseases of despair are no exception. Individuals  
52  
53 312 with Medicare, for example, have 1.5 times higher odds of having a diagnosis of a disease of

1  
2  
3 313 despair, followed by those with ACA (1.3 times higher odds). Insurance status is frequently used  
4  
5 314 as a surrogate for measures of socioeconomic status, which are essential to describing health  
6  
7 315 inequalities. Unfortunately, this is an imperfect proxy.<sup>25</sup>  
8  
9

10 316 A limitation of the current study is the incomplete nature of social determinants of health  
11  
12 317 data in administrative health records. Despite the significant influence of these factors on health  
13  
14 318 outcomes, few sources provide data that includes both clinical and social and behavioral factors.  
15  
16 319 To address this gap in clinical records, the Institute of Medicine Committee on Recommended  
17  
18 320 Social and Behavioral Domains and Measures for Electronic Health Records describes a concise  
19  
20 321 panel of standard measures in every patient's electronic health record.<sup>26</sup> These measures include  
21  
22 322 items evaluating depression, alcohol use, and social connection or isolation which would help  
23  
24 323 capture diagnoses of despair. Future research might consider combining clinical records with  
25  
26 324 data originating outside of claims and electronic health records, including direct and indirect  
27  
28 325 measures of social determinants. Due to the large size of the sample, this study had considerable  
29  
30 326 statistical power and tests were able to detect small but statistically significant effects. Thus, it is  
31  
32 327 important that consideration is given to the practical significance of effects, including the  
33  
34 328 absolute differences in risks over time and between groups.  
35  
36  
37  
38  
39

40 329 A significant strength of the current study is the investigation of the upstream diagnoses  
41  
42 330 for deaths of despair in a large cohort with representation of some of the most impacted states,  
43  
44 331 including West Virginia and Pennsylvania. Further, the use of a large claims-based dataset  
45  
46 332 provides insight into health insurance type as a consideration in the development of future  
47  
48 333 potential healthcare interventions. Finally, these data provide information on current diagnosis  
49  
50 334 rates in the context of long-term trends. Continued improvements to the monitoring and  
51  
52  
53  
54  
55  
56  
57  
58  
59  
60

1  
2  
3 335 identification of substance use and abuse, suicidality, and mental health more broadly are critical  
4  
5 336 next steps to address diseases of despair and ultimately, decrease mortality.  
6

7  
8 337 Future inquiry could benefit from similar “big data” approaches to understand and model  
9  
10 338 patterns of despair in human populations. For instance, it would be useful to identify “hot-spots”  
11  
12 339 of high prevalence/incidence of diseases of despair diagnoses (and deaths of despair) and  
13  
14 340 examine the socioeconomic conditions in these areas over time. While mortality increases are  
15  
16 341 generally—if inscrutably—understood to be due to prolonged declining socioeconomic  
17  
18 342 conditions that exacerbate despair, others argue that the phenomenon is more attributable to other  
19  
20 343 contextual factors such as: a worsening drug environment;<sup>27-29</sup> the collapse of social institutions  
21  
22 344 and weakening of traditional social bonds (e.g. reduced church attendance,<sup>30</sup> union membership,  
23  
24 345 etc.);<sup>31</sup> a generalized cultural rise in loneliness, depression, alienation, and anxiety;<sup>32</sup> higher  
25  
26 346 relative gun ownership in rural areas;<sup>33</sup> and a “loss of virtue”.<sup>34</sup> Using big data to build predictive  
27  
28 347 models of neighborhoods or census tracts where people may be at greatest risk would not only  
29  
30 348 clarify current debates about past causation but also offer a future tool of clinical and public  
31  
32 349 health importance.  
33  
34  
35  
36

37  
38 350 Researchers might also undertake qualitative and/or mixed methods inquiry to examine  
39  
40 351 subjective perceptions of despair in high prevalence communities. There may be particular value  
41  
42 352 in engaging leaders of community and social service organizations (libraries, emergency rooms,  
43  
44 353 methadone treatment centers, suicide prevention organizations, homeless shelters, Women,  
45  
46 354 Infants, and Children (WIC) clinics, legal services organizations, state police, churches, centers,  
47  
48 355 county health services, and places of worship, etc.) who interface with high-risk communities, as  
49  
50 356 well as affected persons and family members. It would be especially useful to better understand  
51  
52 357 general awareness of the diseases of despair concept, local beliefs about causation, perceptions  
53  
54  
55  
56  
57  
58  
59  
60



1  
2  
3  
4  
5  
6  
7  
8  
9  
10  
11  
12  
13  
14  
15  
16  
17  
18  
19  
20  
21  
22  
23  
24  
25  
26  
27  
28  
29  
30  
31  
32  
33  
34  
35  
36  
37  
38  
39  
40  
41  
42  
43  
44  
45  
46  
47  
48  
49  
50  
51  
52  
53  
54  
55  
56  
57  
58  
59  
60

358 of effective policy solutions at the local, state, and national levels, and strategies hospitals can  
359 use to most effectively intervene. Given the complexity of societal despair, combining  
360 quantitative and qualitative approaches may be particularly useful.

361

For peer review only

1  
2  
3 **362 References**  
4

- 5  
6 363 1. Murphy SL, Xu JQ, Kochanek KD, Arias E. Mortality in the United States, 2017. NCHS  
7  
8 364 Data Brief, no 328 Hyattsville, MD: National Center for Health Statistics Available at:  
9  
10 365 <https://www.cdc.gov/nchs/data/databriefs/db328-hpdf> 2018.  
11  
12 366 2. Woolf SH, Schoemaker H, Hill L, Orndahl CM. The social determinants of health and  
13  
14 367 the decline in U.S. life expectancy: implications for Appalachia. *J Appalach Health*  
15  
16 368 2019;1:6-14.  
17  
18 369 3. Case A, Deaton A. Mortality and morbidity in the 21(st) century. *Brookings Pap Econ*  
19  
20 370 *Act*;2017:397-476.  
21  
22 371 4. Case A, Deaton A. Rising morbidity and mortality in midlife among white non-Hispanic  
23  
24 372 Americans in the 21st century. *Proc Natl Acad Sci U S A* 2015;112:15078-83.  
25  
26 373 5. Gleit DA, Goldman N, Weinstein M. A growing socioeconomic divide: Effects of the  
27  
28 374 Great Recession on perceived economic distress in the United States. *PLoS One*  
29  
30 375 2019;14:e0214947.  
31  
32 376 6. Wisman JD. Wage stagnation, rising inequality and the financial crisis of 2008.  
33  
34 377 *Cambridge Journal of Economics* 2013;37:921-45.  
35  
36 378 7. Allred C. Marriage: More than a century of change, 1900-2016. *Family Profiles, FP-18-*  
37  
38 379 *17. Bowling Green State University, OH: National Center for Family & Marriage*  
39  
40 380 *Research; 2018.*  
41  
42 381 8. Livingston G. About one-third of U.S. children are living with an unmarried parent.  
43  
44 382 Available at: [https://www.pewresearch.org/fact-tank/2018/04/27/about-one-third-of-u-s-](https://www.pewresearch.org/fact-tank/2018/04/27/about-one-third-of-u-s-children-are-living-with-an-unmarried-parent/)  
45  
46 383 [children-are-living-with-an-unmarried-parent/](https://www.pewresearch.org/fact-tank/2018/04/27/about-one-third-of-u-s-children-are-living-with-an-unmarried-parent/). Pew Research Center Fact Tank 2018.  
47  
48  
49  
50  
51  
52  
53  
54  
55  
56  
57  
58  
59  
60

- 1  
2  
3 384 9. Hipple SF. Labor force participation: what has happened since the peak? Available at:  
4  
5 385 [https://www.bls.gov/opub/mlr/2016/article/labor-force-participation-what-has-happened-](https://www.bls.gov/opub/mlr/2016/article/labor-force-participation-what-has-happened-since-the-peak.htm)  
6  
7 [since-the-peak.htm](https://www.bls.gov/opub/mlr/2016/article/labor-force-participation-what-has-happened-since-the-peak.htm). Monthly Labor Review, US Bureau of Labor Statistics 2016  
8 386  
9  
10 387 (September).  
11  
12 388 10. Marmot M. Social causes of the slowdown in health improvement. J Epidemiol  
13  
14 389 Community Health 2018;72:359-60.  
15  
16  
17 390 11. Scutchfield FD, Keck CW. Deaths of Despair: Why? What to Do? Am J Public Health  
18  
19 391 2017;107:1564-5.  
20  
21  
22 392 12. Stein EM, Gennuso KP, Ugboaja DC, Remington PL. The Epidemic of Despair Among  
23  
24 393 White Americans: Trends in the Leading Causes of Premature Death, 1999-2015. Am J  
25  
26 394 Public Health 2017;107:1541-7.  
27  
28  
29 395 13. Dodge KA, Price JM, Bachorowski JA, Newman JP. Hostile attributional biases in  
30  
31 396 severely aggressive adolescents. J Abnorm Psychol 1990;99:385-92.  
32  
33 397 14. McEwen BS, Seeman T. Protective and damaging effects of mediators of stress.  
34  
35 398 Elaborating and testing the concepts of allostasis and allostatic load. Ann N Y Acad Sci  
36  
37 399 1999;896:30-47.  
38  
39  
40 400 15. Pulcu E, Trotter PD, Thomas EJ, et al. Temporal discounting in major depressive  
41  
42 401 disorder. Psychol Med 2014;44:1825-34.  
43  
44  
45 402 16. Raison CL, Capuron L, Miller AH. Cytokines sing the blues: inflammation and the  
46  
47 403 pathogenesis of depression. Trends Immunol 2006;27:24-31.  
48  
49 404 17. Shanahan L, Hill SN, Gaydos LM, et al. Does Despair Really Kill? A Roadmap for an  
50  
51 405 Evidence-Based Answer. Am J Public Health 2019;109:854-8.  
52  
53  
54  
55  
56  
57  
58  
59  
60

- 1  
2  
3 406 18. Meit M, Hefferman M, Tanenbaum E, Hoffmann T. Final Report: Appalachian Diseases  
4  
5 407 of Despair. Bethesda, MD: Walsh Center for Rural Health Analysis, NORC at the  
6  
7 408 University of Chicago; 2017.
- 9  
10 409 19. Woolf SH, Chapman DA, Buchanich JM, Bobby KJ, Zimmerman EB, Blackburn SM.  
11  
12 410 Changes in midlife death rates across racial and ethnic groups in the United States:  
13  
14 411 systematic analysis of vital statistics. *BMJ* 2018;362:k3096.
- 16  
17 412 20. Clinical Classifications Software (CCS). Healthcare Cost and Utilization Project  
18  
19 413 (HCUP). 2006-2009. Agency for Healthcare Research and Quality. Available at:  
20  
21 414 [www.hcup-us.ahrq.gov/toolssoftware/ccs/ccs.jsp](http://www.hcup-us.ahrq.gov/toolssoftware/ccs/ccs.jsp).
- 23  
24 415 21. Derrick B, Dobson-Mckittrick A, Toher D, White P. Test statistics for comparing two  
25  
26 416 proportions with partially overlapping samples. *Journal of Applied Quantitative Methods*  
27  
28 417 2015;10.
- 30  
31 418 22. R Core Team. R: A language and environment for statistical computing. R Foundation  
32  
33 419 for Statistical Computing, Vienna, Austria. Available online at: [https://www.R-](https://www.R-project.org/)  
34  
35 420 [project.org/](https://www.R-project.org/). 2018.
- 37  
38 421 23. Gaydos L, Hummer RA, Hargrove TW, et al. The Depths of Despair Among US Adults  
39  
40 422 Entering Midlife. *Am J Public Health* 2019;109:774-80.
- 42  
43 423 24. Marmot M, Bell R. Social determinants and non-communicable diseases: time for  
44  
45 424 integrated action. *BMJ* 2019;364:l251.
- 46  
47 425 25. Casey JA, Pollak J, Glymour MM, Mayeda ER, Hirsch AG, Schwartz BS. Measures of  
48  
49 426 SES for Electronic Health Record-based Research. *Am J Prev Med* 2018;54:430-9.
- 51  
52 427 26. Adler NE, Stead WW. Patients in context--EHR capture of social and behavioral  
53  
54 428 determinants of health. *N Engl J Med* 2015;372:698-701.

- 1  
2  
3 429 27. The Numbers Behind the Opioid Crisis, Prepared by the Vice Chairman's Staff of the  
4  
5 430 Joint Economic Committee at the request of Senator Mike Lee. Available at:  
6  
7  
8 431 [https://www.lee.senate.gov/public/\\_cache/files/b54a2abb-978d-4bbb-a868-](https://www.lee.senate.gov/public/_cache/files/b54a2abb-978d-4bbb-a868-531cdfaeae7a/the-numbers-behind-the-opioid-crisis-final.pdf)  
9  
10 432 [531cdfaeae7a/the-numbers-behind-the-opioid-crisis-final.pdf](https://www.lee.senate.gov/public/_cache/files/b54a2abb-978d-4bbb-a868-531cdfaeae7a/the-numbers-behind-the-opioid-crisis-final.pdf). 2017 (November).  
11  
12 433 28. Masters RK, Tilstra AM, Simon DH. Mortality from Suicide, Chronic Liver Disease, and  
13  
14 434 Drug Poisonings among Middle-Aged U.S. White Men and Women, 1980-2013.  
15  
16 435 *Biodemography Soc Biol* 2017;63:31-7.  
17  
18 436 29. Ruhm CJ. Deaths of Despair or Drug Problems? National Bureau of Economic Research;  
19  
20 437 doi:10.3386/w24188; Available at <https://www.nber.org/papers/w24188.pdf>. 2018.  
21  
22 438 30. Li S, Stampfer MJ, Williams DR, VanderWeele TJ. Association of Religious Service  
23  
24 439 Attendance With Mortality Among Women. *JAMA Intern Med* 2016;176:777-85.  
25  
26 440 31. Opportunity America. Work, Skills, Community. Restoring opportunity for the working  
27  
28 441 class. Available at: [http://opportunityamericaonline.org/wp-](http://opportunityamericaonline.org/wp-content/uploads/2018/10/WCG-final_web.pdf)  
29  
30 442 [content/uploads/2018/10/WCG-final\\_web.pdf](http://opportunityamericaonline.org/wp-content/uploads/2018/10/WCG-final_web.pdf). 2018.  
31  
32 443 32. Smith EE. Blame a 'loneliness epidemic' for risks to nation's well-being. Available at:  
33  
34 444 [https://thehill.com/opinion/civil-rights/385785-americas-loneliness-epidemic-driven-by-](https://thehill.com/opinion/civil-rights/385785-americas-loneliness-epidemic-driven-by-a-crisis-of-meaning)  
35  
36 445 [a-crisis-of-meaning](https://thehill.com/opinion/civil-rights/385785-americas-loneliness-epidemic-driven-by-a-crisis-of-meaning). The Hill 2018.  
37  
38 446 33. Rapaport L. Strict state gun laws linked to fewer suicides and murders. Available at  
39  
40 447 [https://www.reuters.com/article/us-health-firearms-suicides/strict-state-gun-laws-linked-](https://www.reuters.com/article/us-health-firearms-suicides/strict-state-gun-laws-linked-to-fewer-suicides-and-murders-idUSKBN1GH39W)  
41  
42 448 [to-fewer-suicides-and-murders-idUSKBN1GH39W](https://www.reuters.com/article/us-health-firearms-suicides/strict-state-gun-laws-linked-to-fewer-suicides-and-murders-idUSKBN1GH39W). Reuters 2018.  
43  
44 449 34. Vance JD. *Hillbilly Elegy*. New York, NY: Harper Collins; 2016.  
45  
46  
47  
48  
49  
50  
51  
52  
53  
54  
55  
56  
57  
58  
59  
60

**Table 1.** Descriptive Statistics for Study Cohort, Overall and Stratified by the Presence of Disease of Despair (DoD) Diagnosis at any Point during Follow up, 2007 – 2018.

|                            | <b>Overall</b><br>N = 12,144,252<br>(100.0%) | <b>No DoD</b><br>N = 11,628,422<br>(95.8%) | <b>DoD</b><br>N = 515,830<br>(4.2%) | <i>p</i> -value |
|----------------------------|----------------------------------------------|--------------------------------------------|-------------------------------------|-----------------|
|                            | N (%) / M (SD)                               |                                            |                                     |                 |
| Type of DoD Diagnosis      |                                              |                                            |                                     |                 |
| Alcohol-related            | 278,309 (2.3%)                               | -                                          | 278,309 (54.0%)                     |                 |
| Drug-related               | 228,227 (1.9%)                               | -                                          | 228,227 (44.2%)                     |                 |
| Suicide Ideation/Behavior  | 84,117 (0.7%)                                | -                                          | 84,117 (16.3%)                      |                 |
| Multiple Diagnosis Types   | 66,585 (0.5%)                                | -                                          | 66,585 (12.9%)                      |                 |
| Gender                     |                                              |                                            |                                     | <.001           |
| Women                      | 6,124,183 (50.4%)                            | 5,909,902 (50.8%)                          | 214,281 (41.5%)                     |                 |
| Men                        | 6,020,069 (49.6%)                            | 5,718,520 (49.2%)                          | 301,549 (58.5%)                     |                 |
| Age at Enrollment Midpoint |                                              |                                            |                                     | <.001           |
| 0 – 17 years               | 2,666,135 (22%)                              | 2,625,797 (22.6%)                          | 40,338 (7.8%)                       |                 |
| 18 – 25 years              | 1,539,995 (12.7%)                            | 1,456,629 (12.5%)                          | 83,366 (16.2%)                      |                 |
| 26 – 35 years              | 1,752,493 (14.4%)                            | 1,677,395 (14.4%)                          | 75,098 (14.6%)                      |                 |
| 36 – 45 years              | 1,638,938 (13.5%)                            | 1,560,822 (13.4%)                          | 78,116 (15.1%)                      |                 |
| 46 – 55 years              | 1,754,037 (14.4%)                            | 1,659,732 (14.3%)                          | 94,305 (18.3%)                      |                 |
| 56 – 65 years              | 1,628,179 (13.4%)                            | 1,547,308 (13.3%)                          | 80,871 (15.7%)                      |                 |
| 66 – 75 years              | 586,303 (4.8%)                               | 552,101 (4.7%)                             | 34,202 (6.6%)                       |                 |
| 76 – 85 years              | 366,120 (3%)                                 | 345,023 (3%)                               | 21,097 (4.1%)                       |                 |
| 85+ years                  | 212,052 (1.7%)                               | 203,615 (1.8%)                             | 8,437 (1.6%)                        |                 |
| Number of Years Enrolled   | 4.8 (3.4)                                    | 4.7 (3.4)                                  | 6.6 (3.4)                           | <.001           |
| Most Recent Enrollment     |                                              |                                            |                                     | <.001           |
| 2007 – 2009                | 1,467,763 (12.1%)                            | 1,440,453 (12.4%)                          | 27,310 (5.3%)                       |                 |
| 2010 – 2012                | 1,796,257 (14.8%)                            | 1,739,269 (15%)                            | 56,988 (11.0%)                      |                 |
| 2013 – 2015                | 2,528,619 (20.8%)                            | 2,421,676 (20.8%)                          | 106,943 (20.7%)                     |                 |
| 2016 – 2018                | 6,351,613 (52.3%)                            | 6,027,024 (51.8%)                          | 324,589 (62.9%)                     |                 |
| Medical Insurance Type     |                                              |                                            |                                     | <.001           |
| Employer Sponsored         | 9,516,477 (78.4%)                            | 9,105,741 (78.3%)                          | 410,736 (79.6%)                     |                 |
| ACA                        | 354,355 (2.9%)                               | 340,900 (2.9%)                             | 13,455 (2.6%)                       |                 |
| Medicare                   | 752,594 (6.2%)                               | 699,619 (6%)                               | 52,975 (10.3%)                      |                 |
| Other                      | 1,520,825 (12.5%)                            | 1,482,161 (12.7%)                          | 38,664 (7.5%)                       |                 |

Notes: If there were multiple values on file for state or type of insurance, the value covering longest period was selected. ACA plans were available 2014-2018.

452  
453  
454  
455  
456  
457  
458  
459

1  
2  
3  
4  
5  
6  
7  
8  
9  
10  
11  
12  
13  
14  
15  
16  
17  
18  
19  
20  
21  
22  
23  
24  
25  
26  
27  
28  
29  
30  
31  
32  
33  
34  
35  
36  
37  
38  
39  
40  
41  
42  
43  
44  
45  
46  
47  
48  
49  
50  
51  
52  
53  
54  
55  
56  
57  
58  
59  
60

460 *Figure 1. Age and Gender-Specific Diagnostic Prevalence Rates of Diseases of Despair, 2009 –*  
461 *2018.*

462  
463 [attached separately]

For peer review only

468

**Table 2.** Comparison of Age and Gender Specific Annual Incidence of Disease of Despair Diagnoses, 2009 – 2018.

| Age Cohort                       | Men   |       |         |             | Women |       |         |             |
|----------------------------------|-------|-------|---------|-------------|-------|-------|---------|-------------|
|                                  | 2009  | 2018  | p-value | Ratio       | 2009  | 2018  | p-value | Ratio       |
| Any Disease of Despair Diagnosis |       |       |         |             |       |       |         |             |
| > 1 Year                         | .25%  | .52%  | <.001   | <b>2.05</b> | .17%  | .36%  | .001    | <b>2.18</b> |
| 1 - 17 Years                     | .28%  | .38%  | <.001   | <b>1.37</b> | .27%  | .53%  | <.001   | <b>1.96</b> |
| 18 - 34 Years                    | 1.44% | 1.73% | <.001   | <b>1.21</b> | .94%  | 1.42% | <.001   | <b>1.51</b> |
| 35-54 Years                      | 1.21% | 1.58% | <.001   | <b>1.30</b> | .72%  | 1.01% | <.001   | <b>1.40</b> |
| 55-74 Years                      | 1.08% | 1.61% | <.001   | <b>1.48</b> | .53%  | .95%  | <.001   | <b>1.78</b> |
| 75+ Years                        | .99%  | 1.23% | <.001   | <b>1.25</b> | .69%  | .85%  | <.001   | <b>1.23</b> |
| Alcohol-Related Diagnosis        |       |       |         |             |       |       |         |             |
| > 1 Year                         | .03%  | .03%  | 1.000   | .90         | .00%  | .01%  | .951    | -           |
| 1 - 17 Years                     | .09%  | .05%  | <.001   | <b>.60</b>  | .09%  | .04%  | <.001   | <b>.49</b>  |
| 18 - 34 Years                    | .93%  | .97%  | .103    | 1.05        | .45%  | .56%  | <.001   | <b>1.26</b> |
| 35-54 Years                      | .90%  | 1.03% | <.001   | <b>1.15</b> | .36%  | .44%  | <.001   | <b>1.22</b> |
| 55-74 Years                      | .84%  | 1.11% | <.001   | <b>1.32</b> | .26%  | .42%  | <.001   | <b>1.60</b> |
| 75+ Years                        | .63%  | .76%  | .003    | <b>1.19</b> | .24%  | .25%  | .932    | 1.07        |
| Substance-Related Diagnosis      |       |       |         |             |       |       |         |             |
| > 1 Year                         | .23%  | .49%  | <.001   | <b>2.14</b> | .17%  | .36%  | <.001   | <b>2.14</b> |
| 1 - 17 Years                     | .14%  | .08%  | <.001   | <b>0.58</b> | .11%  | .05%  | <.001   | <b>0.47</b> |
| 18 - 34 Years                    | .57%  | .72%  | <.001   | <b>1.26</b> | .44%  | .58%  | <.001   | <b>1.33</b> |
| 35-54 Years                      | .37%  | .58%  | <.001   | <b>1.59</b> | .34%  | .50%  | <.001   | <b>1.50</b> |
| 55-74 Years                      | .26%  | .51%  | <.001   | <b>2.00</b> | .24%  | .49%  | <.001   | <b>2.04</b> |
| 75+ Years                        | .32%  | .37%  | .117    | 1.16        | .39%  | .46%  | <.001   | <b>1.20</b> |
| Suicide-Related Diagnosis        |       |       |         |             |       |       |         |             |
| > 1 Year                         | -     | -     | -       | -           | -     | -     | -       | -           |
| 1 - 17 Years                     | .09%  | .28%  | <.001   | <b>3.20</b> | .13%  | .47%  | <.001   | <b>3.77</b> |
| 18 - 34 Years                    | .14%  | .42%  | <.001   | <b>2.95</b> | .19%  | .52%  | <.001   | <b>2.69</b> |
| 35-54 Years                      | .09%  | .15%  | <.001   | <b>1.81</b> | .13%  | .20%  | <.001   | <b>1.52</b> |
| 55-74 Years                      | .06%  | .13%  | <.001   | <b>2.23</b> | .07%  | .13%  | <.001   | <b>1.75</b> |
| 75+ Years                        | .08%  | .16%  | <.001   | <b>2.09</b> | .08%  | .14%  | <.001   | <b>1.83</b> |

Notes: Ratios represent 2018 rates relative to 2009 incidence rates. Bolded ratios correspond to statistically significant differences in diagnostic incidence.

469

470

471

472

473

474

475



**Table 3.** Comparison of Age and Gender Specific Annual Prevalence of Disease of Despair Diagnoses, 2009 – 2018.

| Age Cohort                       | Men   |       |                 |             | Women |       |                 |             |
|----------------------------------|-------|-------|-----------------|-------------|-------|-------|-----------------|-------------|
|                                  | 2009  | 2018  | <i>p</i> -value | Ratio       | 2009  | 2018  | <i>p</i> -value | Ratio       |
| Any Disease of Despair Diagnosis |       |       |                 |             |       |       |                 |             |
| > 1 Year                         | .25%  | .52%  | <.001           | <b>2.05</b> | .17%  | .36%  | <.001           | <b>2.18</b> |
| 1 - 17 Years                     | .33%  | .45%  | <.001           | <b>1.37</b> | .32%  | .65%  | <.001           | <b>2.04</b> |
| 18 - 34 Years                    | 1.93% | 2.66% | <.001           | <b>1.38</b> | 1.19% | 2.05% | <.001           | <b>1.71</b> |
| 35-54 Years                      | 1.72% | 2.68% | <.001           | <b>1.56</b> | 1.03% | 1.68% | <.001           | <b>1.63</b> |
| 55-74 Years                      | 1.55% | 2.72% | <.001           | <b>1.75</b> | .72%  | 1.59% | <.001           | <b>2.21</b> |
| 75+ Years                        | 1.27% | 1.89% | <.001           | <b>1.49</b> | 0.80% | 1.18% | <.001           | <b>1.46</b> |
| Alcohol-Related Diagnosis        |       |       |                 |             |       |       |                 |             |
| > 1 Year                         | .03%  | .03%  | 1.000           | 0.90        | .00%  | .01%  | 0.950           | -           |
| 1 - 17 Years                     | .10%  | .07%  | <.001           | <b>0.67</b> | .10%  | .05%  | <.001           | <b>0.53</b> |
| 18 - 34 Years                    | 1.12% | 1.30% | <.001           | <b>1.16</b> | .52%  | .72%  | <.001           | <b>1.37</b> |
| 35-54 Years                      | 1.23% | 1.54% | <.001           | <b>1.25</b> | .52%  | .68%  | <.001           | <b>1.29</b> |
| 55-74 Years                      | 1.23% | 1.85% | <.001           | <b>1.51</b> | .38%  | .69%  | <.001           | <b>1.84</b> |
| 75+ Years                        | 0.87% | 1.24% | <.001           | <b>1.43</b> | .31%  | .37%  | 0.140           | 1.17        |
| Substance-Related Diagnosis      |       |       |                 |             |       |       |                 |             |
| > 1 Year                         | .23%  | .49%  | <.001           | <b>2.14</b> | .17%  | .36%  | <.001           | <b>2.14</b> |
| 1 - 17 Years                     | .17%  | .09%  | <.001           | <b>0.57</b> | .13%  | .06%  | <.001           | <b>0.46</b> |
| 18 - 34 Years                    | .85%  | 1.30% | <.001           | <b>1.53</b> | .59%  | .96%  | <.001           | <b>1.62</b> |
| 35-54 Years                      | .53%  | 1.19% | <.001           | <b>2.24</b> | .48%  | .92%  | <.001           | <b>1.93</b> |
| 55-74 Years                      | .33%  | .88%  | <.001           | <b>2.70</b> | .30%  | .83%  | <.001           | <b>2.73</b> |
| 75+ Years                        | .35%  | .51%  | <.001           | <b>1.47</b> | .42%  | .67%  | <.001           | <b>1.59</b> |
| Suicide-Related Diagnosis        |       |       |                 |             |       |       |                 |             |
| > 1 Year                         | -     | -     | -               | -           | -     | -     | -               | -           |
| 1 - 17 Years                     | .09%  | .31%  | <.001           | <b>3.43</b> | .14%  | .58%  | <.001           | <b>4.17</b> |
| 18 - 34 Years                    | .15%  | .49%  | <.001           | <b>3.20</b> | .21%  | .64%  | <.001           | <b>3.03</b> |
| 35-54 Years                      | .09%  | .17%  | <.001           | <b>1.89</b> | .14%  | .23%  | <.001           | <b>1.60</b> |
| 55-74 Years                      | .06%  | .15%  | <.001           | <b>2.33</b> | .08%  | .15%  | <.001           | <b>1.88</b> |
| 75+ Years                        | .08%  | .17%  | <.001           | <b>2.11</b> | .09%  | .17%  | <.001           | <b>1.94</b> |

Notes: Ratios represent 2018 rates relative to 2009 prevalence rates. Bolded ratios correspond to statistically significant differences in diagnostic prevalence.

476  
477  
478  
479  
480  
481

**Table 4.** Risk for Disease of Despair Diagnosis as a Function of Demographic and Enrollment Characteristics, 2018.

| Variable                             | Any Disease of Despair                        |                     | Alcohol-Related Diagnosis |                     | Substance-Related Diagnosis |                     | Suicide-Related Diagnosis |                     |
|--------------------------------------|-----------------------------------------------|---------------------|---------------------------|---------------------|-----------------------------|---------------------|---------------------------|---------------------|
|                                      | Adjusted Odds Ratio (95% Confidence Interval) |                     |                           |                     |                             |                     |                           |                     |
| Men [ref = Women]                    | <b>1.49</b>                                   | <b>(1.47, 1.51)</b> | <b>2.35</b>               | <b>(2.30, 2.41)</b> | <b>1.23</b>                 | <b>(1.20, 1.25)</b> | <b>0.72</b>               | <b>(0.70, 0.75)</b> |
| Age [ref = 18-34]                    |                                               |                     |                           |                     |                             |                     |                           |                     |
| <1                                   | <b>0.18</b>                                   | <b>(0.15, 0.22)</b> | <b>0.02</b>               | <b>(0.01, 0.04)</b> | <b>0.37</b>                 | <b>(0.31, 0.44)</b> | -                         | -                   |
| 1-17                                 | <b>0.23</b>                                   | <b>(0.22, 0.24)</b> | <b>0.06</b>               | <b>(0.05, 0.06)</b> | <b>0.07</b>                 | <b>(0.06, 0.08)</b> | <b>0.79</b>               | <b>(0.75, 0.83)</b> |
| 35-54                                | <b>0.92</b>                                   | <b>(0.90, 0.94)</b> | <b>1.09</b>               | <b>(1.06, 1.13)</b> | <b>0.92</b>                 | <b>(0.90, 0.95)</b> | <b>0.35</b>               | <b>(0.33, 0.37)</b> |
| 55-74                                | <b>0.83</b>                                   | <b>(0.81, 0.84)</b> | <b>1.19</b>               | <b>(1.15, 1.22)</b> | <b>0.66</b>                 | <b>(0.64, 0.68)</b> | <b>0.21</b>               | <b>(0.20, 0.23)</b> |
| 75+                                  | <b>0.44</b>                                   | <b>(0.42, 0.46)</b> | <b>0.59</b>               | <b>(0.55, 0.63)</b> | <b>0.34</b>                 | <b>(0.31, 0.36)</b> | <b>0.15</b>               | <b>(0.13, 0.17)</b> |
| Insurance [ref = employer sponsored] |                                               |                     |                           |                     |                             |                     |                           |                     |
| ACA                                  | <b>1.30</b>                                   | <b>(1.24, 1.37)</b> | <b>1.37</b>               | <b>(1.28, 1.48)</b> | <b>1.33</b>                 | <b>(1.24, 1.42)</b> | 1.05                      | (0.91, 1.21)        |
| Medicare                             | <b>1.51</b>                                   | <b>(1.46, 1.55)</b> | <b>1.30</b>               | <b>(1.25, 1.36)</b> | <b>1.73</b>                 | <b>(1.65, 1.81)</b> | <b>2.19</b>               | <b>(1.98, 2.43)</b> |
| Other                                | <b>0.71</b>                                   | <b>(0.67, 0.74)</b> | <b>0.73</b>               | <b>(0.68, 0.78)</b> | <b>0.61</b>                 | <b>(0.57, 0.66)</b> | <b>0.84</b>               | <b>(0.77, 0.92)</b> |

Notes: Bold indicates statistical significance,  $p < .05$ .

482

483

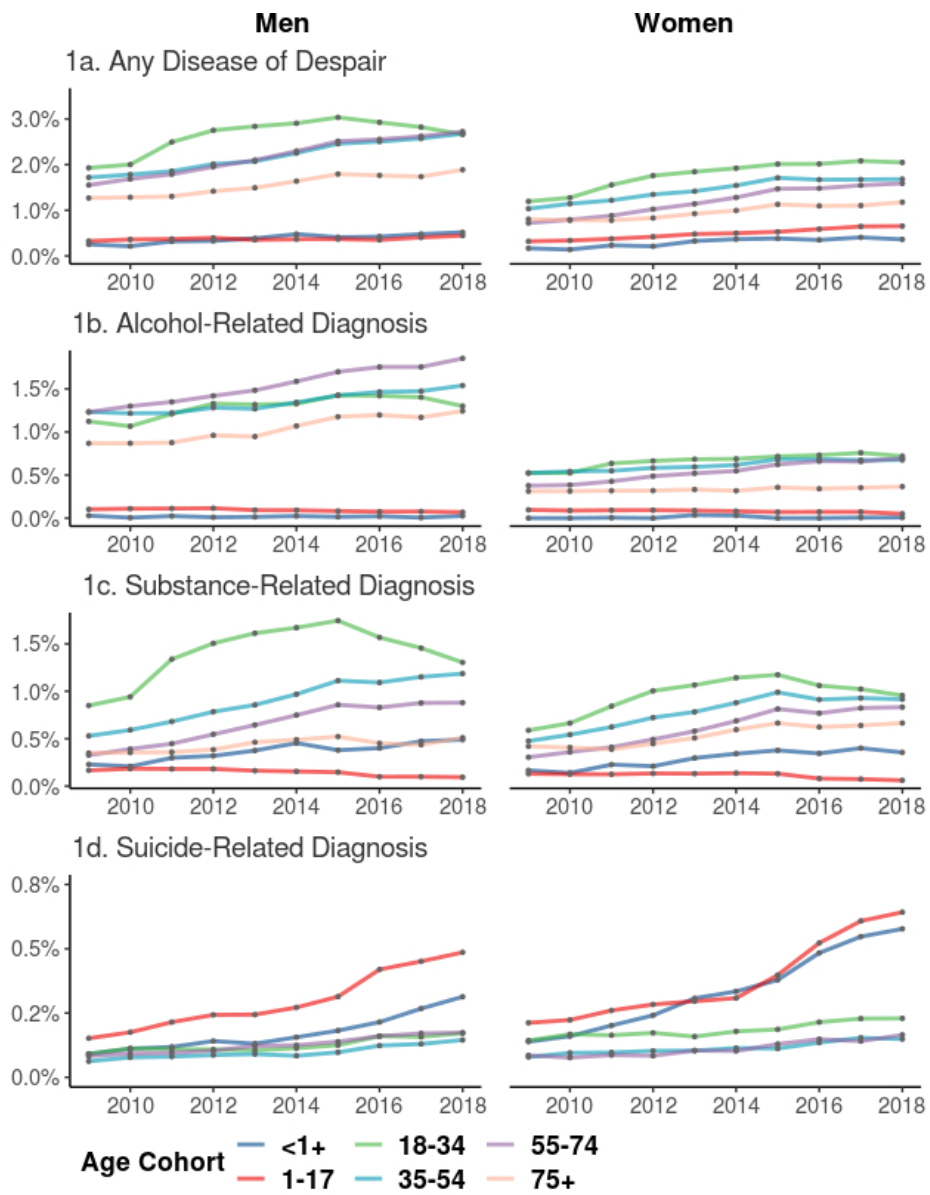

Figure 1

# BMJ Open

## Trends in the Diagnosis of Diseases of Despair in the United States, 2009 – 2018: A Retrospective Cohort Study

|                                 |                                                                                                                                                                                                                                                                                                                                                                                                                                                                                                                                                  |
|---------------------------------|--------------------------------------------------------------------------------------------------------------------------------------------------------------------------------------------------------------------------------------------------------------------------------------------------------------------------------------------------------------------------------------------------------------------------------------------------------------------------------------------------------------------------------------------------|
| Journal:                        | <i>BMJ Open</i>                                                                                                                                                                                                                                                                                                                                                                                                                                                                                                                                  |
| Manuscript ID                   | bmjopen-2020-037679.R1                                                                                                                                                                                                                                                                                                                                                                                                                                                                                                                           |
| Article Type:                   | Original research                                                                                                                                                                                                                                                                                                                                                                                                                                                                                                                                |
| Date Submitted by the Author:   | 12-May-2020                                                                                                                                                                                                                                                                                                                                                                                                                                                                                                                                      |
| Complete List of Authors:       | Brignone, Emily; Highmark Blue Cross Blue Shield, Data Science Research and Development<br>George, Daniel; Penn State College of Medicine<br>Sinoway, Lawrence; Penn State College of Medicine<br>Katz, Curren; Highmark Blue Cross Blue Shield, Data Science Research and Development<br>Sauder, Charity; Penn State College of Medicine<br>Murray, Andrea; Penn State College of Medicine<br>Gladden, Robert; Highmark Blue Cross Blue Shield, Data Science Research and Development<br>Kraschnewski, Jennifer; Penn State College of Medicine |
| <b>Primary Subject Heading</b>: | Public health                                                                                                                                                                                                                                                                                                                                                                                                                                                                                                                                    |
| Secondary Subject Heading:      | Sociology, Mental health, Epidemiology                                                                                                                                                                                                                                                                                                                                                                                                                                                                                                           |
| Keywords:                       | EPIDEMIOLOGY, Risk management < HEALTH SERVICES ADMINISTRATION & MANAGEMENT, MENTAL HEALTH, PREVENTIVE MEDICINE, PUBLIC HEALTH, SOCIAL MEDICINE                                                                                                                                                                                                                                                                                                                                                                                                  |
|                                 |                                                                                                                                                                                                                                                                                                                                                                                                                                                                                                                                                  |

SCHOLARONE™  
Manuscripts



I, the Submitting Author has the right to grant and does grant on behalf of all authors of the Work (as defined in the below author licence), an exclusive licence and/or a non-exclusive licence for contributions from authors who are: i) UK Crown employees; ii) where BMJ has agreed a CC-BY licence shall apply, and/or iii) in accordance with the terms applicable for US Federal Government officers or employees acting as part of their official duties; on a worldwide, perpetual, irrevocable, royalty-free basis to BMJ Publishing Group Ltd ("BMJ") its licensees and where the relevant Journal is co-owned by BMJ to the co-owners of the Journal, to publish the Work in this journal and any other BMJ products and to exploit all rights, as set out in our [licence](#).

The Submitting Author accepts and understands that any supply made under these terms is made by BMJ to the Submitting Author unless you are acting as an employee on behalf of your employer or a postgraduate student of an affiliated institution which is paying any applicable article publishing charge ("APC") for Open Access articles. Where the Submitting Author wishes to make the Work available on an Open Access basis (and intends to pay the relevant APC), the terms of reuse of such Open Access shall be governed by a Creative Commons licence – details of these licences and which [Creative Commons](#) licence will apply to this Work are set out in our licence referred to above.

Other than as permitted in any relevant BMJ Author's Self Archiving Policies, I confirm this Work has not been accepted for publication elsewhere, is not being considered for publication elsewhere and does not duplicate material already published. I confirm all authors consent to publication of this Work and authorise the granting of this licence.

1  
2  
3 1  
4 2 **Trends in the Diagnosis of Diseases of Despair in the United States, 2009 – 2018: A**  
5 3 **Retrospective Cohort Study**  
6 4  
7 4  
8

9 5 Emily Brignone, PhD<sup>1</sup>, Daniel George, PhD, MSc<sup>2</sup>, Lawrence Sinoway, MD<sup>2</sup>, Curren Katz,  
10 6 PhD<sup>1</sup>, Charity Sauder, MS<sup>2</sup>, Andrea Murray, MPH<sup>2</sup>, Robert Gladden, MA<sup>1</sup>, Jennifer  
11 7 Kraschnewski, MD, MPH<sup>2</sup>  
12 8

13 9 <sup>1</sup> Highmark Health, Pittsburgh, PA, <sup>2</sup> Penn State University College of Medicine, Hershey, PA  
14 9  
15 10  
16 11  
17 12  
18 13  
19 14  
20 15  
21 16  
22 17  
23 18  
24 19  
25 20  
26 21  
27 22  
28 23  
29 24  
30 25  
31 26  
32 27  
33 28  
34 29  
35 30  
36 31  
37 32  
38 33  
39 34  
40 35  
41 36  
42 37  
43 38  
44 39  
45 40  
46 41  
47 42  
48 43  
49 44  
50 45  
51  
52  
53  
54  
55  
56  
57  
58  
59  
60

34 **Corresponding Author:**

35 Emily Brignone, PhD  
36 120 Fifth Avenue  
37 Pittsburgh, PA 15222  
38 (801)-897-3247  
39 [emily.brignone@highmarkhealth.org](mailto:emily.brignone@highmarkhealth.org)  
40  
41  
42  
43  
44  
45

1  
2  
3 46  
4  
5  
6 47  
7 48  
8 49  
9 50  
10 51  
11 52  
12 53  
13  
14 54  
15 55  
16 56  
17 57  
18 58  
19 59  
20 60  
21  
22 61  
23 62  
24 63  
25 64  
26 65  
27 66  
28 67  
29 68  
30 69  
31 70  
32 71  
33 72  
34 73  
35 74  
36 75  
37 76  
38 77  
39 78  
40 79  
41 80  
42 81  
43 82  
44 83  
45 84  
46 85  
47  
48  
49  
50  
51  
52  
53  
54  
55  
56  
57  
58  
59  
60

## Abstract

**Background and Objective:** Increasing mortality and decreasing life expectancy in the U.S. are largely attributable to accidental overdose, alcohol-related disease, and suicide. These “deaths of despair” often follow years of morbidity, yet little is known about trends in the clinical recognition of “diseases of despair”. The objective of this study is to characterize rates of clinically documented diseases of despair over the last decade and identify sociodemographic risk factors.

**Design:** Retrospective study using a healthcare claims database with 10 years of follow-up.

**Setting:** Participants resided nationwide but were concentrated in U.S. states disproportionately affected by deaths of despair, including Pennsylvania, West Virginia, and Delaware.

**Participants:** Cohort included 12,144,252 participants, with no restriction by age or gender.

**Outcome Measures:** Diseases of despair were defined as diagnoses related to alcohol misuse, substance misuse, and suicide ideation/behaviors. A lookback period was used to identify incident diagnoses. Annual and all-time incidence/prevalence estimates were computed, along with risk for current diagnosis and patterns of comorbidity.

**Results:** 515,830 participants received a disease of despair diagnosis (58.5% male, median 36 years). From 2009-2018, the prevalence of alcohol-, substance-, and suicide-related diagnoses respectively increased by 37%, 94%, and 170%. Ages 55-74 had the largest increase in alcohol/substance related diagnoses (59% and 172%). Ages <18 had the largest increase in suicide-related diagnoses (287%). Overall, odds for current-year diagnosis were higher among men (Adjusted Odds Ratio [AOR] = 1.49, 95% CI=1.47-1.51), and among those with Affordable Care Act or Medicare coverage relative to commercial coverage (AOR=1.30, 1.24-1.37; AOR=1.51, 1.46-1.55).

**Conclusions:** Increasing clinical rates of disease of despair diagnoses largely mirror broader societal trends in mortality. While the opioid crisis remains a top public health priority, parallel rises in alcohol-related diagnoses and suicidality must be concurrently addressed. Findings suggest opportunities for healthcare systems and providers to deploy targeted prevention to mitigate the progression of morbidities toward mortality.

1  
2  
3 86  
45 87 **Strengths and limitations of this study:**  
6  
7

- 8 88 • Increasing mortality due to deaths of despair is well documented in extant research. To  
9 89 our knowledge, this study is the first to provide large-scale insights into the clinical  
10 90 recognition of the morbidities that can ultimately culminate in those deaths. This clinical  
11 91 perspective highlights potential opportunities to intervene in the progression of morbidity  
12 92 toward mortality.  
13 93
- 14 94 • The study uses a large and inclusive sample. As a result, we are able to identify  
15 95 differential patterns in the diagnosis of substance-, alcohol-, and suicide-related diagnoses  
16 96 across age and gender lines, which can improve targeted prevention efforts.  
17 97
- 18 98 • The long administrative surveillance period of 10 years allows us to track changes in the  
19 99 identification of diseases of despair over time, and to compare long-term trends between  
20 100 documented morbidity and mortality.  
21 101
- 22 102 • While trends in deaths of despair appear to vary by race/ethnicity, details on  
23 103 race/ethnicity were not available for our sample.  
24 104
- 25 105 • We were unable to directly link disease of despair incidence/prevalence to mortality on  
26 106 an individual level; rather, we compare trends in morbidity and mortality in more general  
27 107 terms.  
28 108  
29 109  
30 110  
31 111  
32 112  
33 113  
34 114  
35 115  
36 116  
37 117  
38 118  
39 119  
40 120  
41 121  
42 122  
43 123  
44 124  
45 125  
46 126  
47 127  
48 128  
49  
50  
51  
52  
53  
54  
55  
56  
57  
58  
59  
60



1  
2  
3 129 From 2015-2017, there was an annual downward trend in life expectancy in the United  
4  
5 130 States, the longest sustained decline since 1915-1918.<sup>1,2</sup> Relatedly, researchers have observed a  
6  
7  
8 131 longer, more marked increase in the all-cause mortality of middle-aged white non-Hispanic men  
9  
10 132 and women in the US between 1999 and 2015, with premature deaths largely associated with  
11  
12 133 “deaths of despair,” including suicides, accidental poisonings (e.g. opiate overdose), and alcohol-  
13  
14 134 related liver disease (e.g. cirrhosis).<sup>3,4</sup>

15  
16  
17 135 This troubling observation has coincided with decades of economic decline for less  
18  
19 136 educated and unskilled workers, stagnant or falling real median wages and family incomes,<sup>5,6</sup>  
20  
21 137 lower marriage rates,<sup>7</sup> increases in single-parent households,<sup>8</sup> and disengagement from the labor  
22  
23 138 force.<sup>9</sup> It is theorized that these changes have fostered growing feelings of despair, i.e.,  
24  
25 139 disillusionment, precariousness, and resignation.<sup>3,4,10-12</sup> Despair may in turn trigger emotional,  
26  
27 140 cognitive, behavioral, and even biological changes,<sup>13-17</sup> increasing the likelihood of diseases that  
28  
29 141 can progress and ultimately culminate in these deaths of despair.  
30  
31

32  
33 142 While this pathway may unfold over years or decades, to date, most studies in this  
34  
35 143 domain have primarily focused on the endpoint of mortality. Limited extant research suggests a  
36  
37 144 parallel rise in associated morbidities,<sup>3,4</sup> but specific estimates of “disease of despair” morbidity  
38  
39 145 (i.e., substance-related disorders, alcohol-related disorders, and suicide ideation and attempts) are  
40  
41 146 lacking. Moreover, little is known about trends in the recognition and documentation of these  
42  
43 147 diseases in the clinical setting. This represents an important gap in the literature; indeed, while  
44  
45 148 primary prevention efforts to address the root causes of societal despair are needed, it may be  
46  
47 149 possible to intervene upon the pathway from morbidity to mortality in the clinical setting. An  
48  
49 150 understanding of diagnostic patterns and the association between documented morbidity and  
50  
51 151 mortality is necessary to guide these secondary and tertiary prevention efforts. Thus, the  
52  
53  
54  
55  
56  
57  
58  
59  
60

1  
2  
3 152 objectives of the present study were to use a large administrative database of healthcare claims to  
4  
5 153 1) characterize the incidence and prevalence of diseases of despair diagnoses over the last decade  
6  
7 154 and 2) identify individual sociodemographic factors and patterns of comorbidity associated with  
8  
9  
10 155 disease of despair diagnosis. Finally, patterns in morbidity and mortality are discussed.

## 12 156 **Methods**

14  
15 157 This retrospective cohort study used claims data extracted from the administrative  
16  
17 158 databases of Highmark Inc., a large US-based health insurance company. Highmark members are  
18  
19 159 concentrated in states that have been disproportionately affected by deaths of despair, including  
20  
21 160 Pennsylvania, West Virginia, and Delaware.<sup>18,19</sup> The database contains clinical information such  
22  
23  
24 161 as services used and diagnoses assigned, and sociodemographic characteristics including gender,  
25  
26 162 age, home address, and insurance coverage details. The study cohort included 12 million  
27  
28 163 individuals who were enrolled in a Highmark health insurance plan between 2007 and 2018, and  
29  
30  
31 164 who had a valid age, gender, and home address on file. Over 98.5% of enrolled individuals met  
32  
33 165 inclusion criteria and were included in the final analytic cohort.

### 35 166 *Study Variables*

37  
38 167 Diseases of despair were defined as diagnoses related to alcohol use, substance use, and  
39  
40 168 suicide ideation/behaviors. International Classification of Diseases (ICD) codes were extracted  
41  
42 169 from claims and classified into variables indicating the presence or absence of a diagnosis within  
43  
44 170 each of the three diagnostic categories of interest. Classifications were adapted from the  
45  
46 171 Healthcare Cost and Utilization Project Clinical Classification Software (HCUP-CCS).<sup>20</sup> Code  
47  
48 172 mappings were used for HCUP categories alcohol-related disorders (5.11), substance-related  
49  
50 173 disorders (5.12), and suicide and intentional self-inflicted injury (5.13). Diagnoses related to  
51  
52  
53 174 substance use considered outside the focus of the present study were excluded, specifically,

1  
2  
3 175 codes related to the use of tobacco and cannabis, and certain non-psychoactive substances (i.e.,  
4  
5 176 ICD-10 codes F550, F551, F552, F554). Additional indicators were created for overall disease of  
6  
7  
8 177 despair status (diagnosis of any type), and co-occurring diseases of despair status (diagnoses in  
9  
10 178 multiple categories). A two-year lookback period was used to identify incident diagnoses. If no  
11  
12 179 record of the given diagnosis type was found during the lookback period, the diagnosis was  
13  
14 180 recorded as an incident case. Annual and all-time incidence and prevalence estimates were  
15  
16  
17 181 computed.

18  
19 182 Additional clinical comorbidities were calculated for the final year of follow-up (2018).  
20  
21 183 Physical health comorbidities were measured using weighted Charlson Comorbidity Index  
22  
23 184 Scores.<sup>21</sup> Psychiatric comorbidities were defined using additional HCUP-CCS classifications,  
24  
25  
26 185 and included indicators for adjustment/anxiety disorders (5.1 and 5.2), mood disorders (5.8), and  
27  
28 186 schizophrenia and other psychotic disorders (5.10).

29  
30  
31 187 Existing research points to particular age groups as having uniquely high risk for deaths  
32  
33 188 of despair overall and by particular subtype. Thus, individuals in the sample were stratified into  
34  
35 189 age groups to allow for comparison between morbidity and mortality trends. Infants less than 1-  
36  
37 190 year-old were analyzed separately included in order to capture the effects of maternal substance  
38  
39  
40 191 use. The remaining age groups included 1-17 years, 18-34 years, 35-54 years, 55-75 years, and  
41  
42 192 75+-years-old.

43  
44 193 Insurance product information was recoded into the following categories: Employer  
45  
46 194 sponsored; individual market Affordable Care Act (ACA) plans; Medicare, and Other. Product  
47  
48 195 information was captured on an annual basis. If multiple products were found on file during a  
49  
50  
51 196 single year, the product covering the larger number of months was recorded.

1  
2  
3 197 To determine whether cohort members were at-risk for being diagnosed with a disease of  
4  
5 198 despair at any given point, the months enrolled during each year of follow-up were recorded for  
6  
7  
8 199 all cohort members. Except for newborns, members were considered “enrolled” for a given year  
9  
10 200 if they were covered for at least 10 months out of the year. Newborns were considered enrolled if  
11  
12 201 coverage was identified within the first 90 days of life.

## 14 202 **Data Analysis**

### 16 203 *Incidence and Prevalence of Diseases of Despair*

17  
18  
19 204 Descriptive statistics were computed for all study variables both overall and stratified by  
20  
21 205 diagnostic status (“any” versus “no” disease of despair diagnosis recorded over the course of  
22  
23 206 follow-up). Differences were statistically compared using chi-square tests for categorical  
24  
25 207 variables, and t-tests for continuous variables. Next, overall and gender- and age-specific  
26  
27 208 incidence and prevalence rates of disease of despair diagnosis were computed for years 2009  
28  
29 209 through 2018, allowing for an initial lookback period beginning in 2007. Rates were calculated  
30  
31 210 by dividing the number of newly identified cases by the number of members enrolled and with  
32  
33 211 no previous diagnosis in the past two years (incidence), and the number of current year cases by  
34  
35 212 number of members enrolled (prevalence). For the final year of follow-up, descriptive statistics  
36  
37 213 were also computed for weighted Charlson comorbidity scores and additional psychiatric  
38  
39 214 comorbidities.

40  
41  
42 215 The partially overlapping samples z-test<sup>22</sup> was used to statistically test if and the degree  
43  
44 216 to which rates of diseases of despair changed over the last decade. The partially overlapping test  
45  
46 217 is designed for the statistical comparison of proportions when data include a combination of  
47  
48 218 paired and unpaired samples, as is often the case in dynamic cohorts extracted from clinical  
49  
50  
51 219 databases.

220 *Predicting Individual-level Risk for Diseases of Despair*

221 To identify factors associated with individual-level risk for disease of despair diagnosis  
222 during the most recent year of follow-up (2018), logistic regression was used to estimate risk for  
223 diagnosis as a function of demographic and enrollment characteristics. Odds ratios and their 95%  
224 confidence intervals were computed for all estimates. Analyses were performed using R, version  
225 3.5.2<sup>23</sup> within Highmark's secure computing environment.

226 *Patient and Public Involvement*

227 Patients or the public were not involved in the design, conduct, reporting, or  
228 dissemination plans of this research. The study was approved by the Institutional Review Boards  
229 of Penn State College of Medicine and the Allegheny Health Network Research Institute (acting  
230 IRB for Highmark Health). Informed consent was waived, as no study participants were  
231 contacted. Due to privacy laws, data cannot be made publicly available.

232 **Results**

233 Overall, 4.2% of cohort members (N = 515,830) were diagnosed with at least one disease of  
234 despair at some point during follow-up. Among these, 54.0% were diagnosed with an alcohol-  
235 related disorder, 44.2% with a substance-related disorder, and 16.3% with suicide  
236 ideation/behaviors; multiple types of diseases of despair diagnoses were recorded for 12.9%.

237 Additional cohort description is presented in **Table 1**.

238 [TABLE 1]

239 Age and gender-specific diagnostic prevalence rates from 2009 to 2018 are presented in  
240 **Figure 1**. Aggregate incidence and prevalence rates and statistical comparisons between 2009  
241 and 2018 are discussed in the following sections. Age- and gender-stratified statistics are  
242 presented in **Tables 2 and 3**.

243 [FIGURE 1, TABLES 1 AND 2]

244 *Any Disease of Despair Diagnosis*

245 Between 2009 and 2018, the annual diagnostic incidence of diseases of despair increased  
246 by 44%, and the diagnostic prevalence increased by 68%. Significant increases were seen for  
247 both men and women across every age group, although the magnitude of increases varied along  
248 age and gender lines. Due to the relatively low base rate of diseases of despair, small increases in  
249 the absolute rates (i.e., percentage point increases) often translated to large increases in the  
250 comparison of 2018 rates to 2009 rates (i.e., relative rate increases). While percentage point  
251 increases tended to be smaller among women compared to men, relative rate increases tended to  
252 be larger among women.

253 *Alcohol-related Diagnosis*

254 The overall incidence and prevalence of alcohol-related diagnosis increased by 23% and  
255 37%, respectively. Significant increases were seen for men and women ages 18 and above, but  
256 significant decreases were seen for those ages 1-17. The most dramatic increases were seen  
257 among those ages 55-74; their prevalence increased by .5% percentage points (59% relative  
258 increase).

259 *Substance-related Diagnosis*

260 The overall incidence and prevalence of substance-related diagnosis increased by 48%  
261 and 94%, respectively. As with the trends observed for alcohol-related diagnoses, the incidence  
262 and prevalence of substance-related diagnoses increased for all groups except for those ages 1-  
263 17; for this group, rates significantly decreased. Relative increases were again highest for those  
264 ages 55-57 (prevalence 172% higher; .5% percentage point increase), and for infants (prevalence  
265 114% higher; .25% percentage point increase).

266 *Suicide Ideation / Behaviors Diagnosis*

267           The incidence and prevalence of suicide-related diagnosis increased for all relevant age  
268 groups (infants were excluded) by 149% and 170%, respectively. While the absolute rates of  
269 suicide-related diagnosis were lower than other types of disease of despair diagnoses, the relative  
270 increases were dramatic. Among those ages 1-17, the prevalence increased by 287%. Among  
271 those ages 18-34, it increased by 210%. All other age groups saw a relative increase of at least  
272 70%.

273 *Logistic Regression Results*

274           Results of logistic regression models predicting the odds for 2018 disease of despair  
275 diagnoses as a function of individual and enrollment characteristics are presented in **Table 4**.

276 [TABLE 4]

277           Men had higher odds than women for having any type of disease of despair diagnosis,  
278 alcohol-related diagnosis, and substance-related diagnosis (AOR [adjusted odds ratio] = 1.49,  
279 2.35, and 1.23, respectively), but lower odds than women for suicide ideation/behaviors (AOR =  
280 0.72). Age was also significantly associated with risk for all four disease of despair outcomes.  
281 After adjusting for gender and insurance type, individuals ages 18-35 had the highest risk for any  
282 disease of despair, substance-related diagnosis, and suicide-related diagnosis. For alcohol-related  
283 disorders, those ages 35-74 were at slightly higher risk than those ages 18-34, and much higher  
284 risk than any other group. Finally, type of enrollment was also significantly related to risk.  
285 Compared to commercial insurance plans, Affordable Care Act (ACA) plans were associated  
286 with approximately 1.3 times higher odds for any diagnosis, alcohol-related diagnosis, and  
287 substance-related diagnosis, but similar risk for suicide-related diagnoses. Medicare plans were

1  
2  
3 288 associated with 1.5 times higher odds for any disease of despair and each of the three diagnostic  
4  
5 289 subtypes (AOR range was 1.3-2.2).  
6

### 7 290 *Clinical Comorbidities*

8  
9  
10 291 Table 5 includes average weighted Charlson comorbidity scores and diagnostic  
11  
12 292 prevalence rates for adjustment/anxiety disorders, mood disorders, and schizophrenia and other  
13  
14 293 psychotic disorders in 2018, stratified by age, gender, and the presence of a disease of despair  
15  
16 294 diagnosis during the same year.  
17

18  
19 295 [TABLE 5]  
20

21 296 Disease of despair diagnosis was associated with significantly higher mean comorbidity  
22  
23 297 scores and significantly higher prevalence of each psychiatric comorbidity for both men and  
24  
25 298 women across every age group. As expected, chronic health conditions were rare among younger  
26  
27 299 cohort members, yet compared to those without disease of despair diagnoses, the average  
28  
29 300 Charlson score among those with disease of despair diagnoses was at least two times higher for  
30  
31 301 every age group up to 74 years. The range of the diagnostic prevalence of adjustment/anxiety  
32  
33 302 disorders was 6.3% to 21.2% among those without disease of despair diagnoses, and 31.0% to  
34  
35 303 84.2% among those with diagnoses. Similarly, the diagnostic prevalence of mood disorders  
36  
37 304 ranged from 2.0% to 15.6% among those without disease of despair diagnoses, and 31.2% to  
38  
39 305 78.7% among those with a diagnosis. Finally, while diagnoses of schizophrenia and other  
40  
41 306 psychotic disorders were very rare among those without disease of despair diagnoses, their  
42  
43 307 diagnostic prevalence ranged from 2.1% to 10.3% among those with diagnoses.  
44  
45  
46  
47  
48

### 49 308 **Discussion**

50  
51 309 Nearly one in twenty individuals in our sample were clinically diagnosed with a disease  
52  
53 310 of despair between 2007 and 2018. Similar to observed despair-related mortality, diseases of  
54  
55  
56  
57  
58  
59  
60



1  
2  
3 311 despair have significantly increased as morbidities over the past decade.<sup>24</sup> Tracking with the  
4  
5 312 original finding that deaths of despair have disproportionately affected middle-aged men,<sup>3</sup> our  
6  
7 313 data showed the largest absolute increases in overall prevalence for men ages 35-74, followed by  
8  
9 314 women ages 55-74 and 18-34. These findings reinforce the notion that while the opioid crisis  
10  
11 315 remains a top public health priority, parallel rises in alcohol-related diagnoses and suicidality  
12  
13 316 must be concurrently addressed.<sup>25</sup> Relatedly, the association between diseases of despair and  
14  
15 317 chronic health conditions at all ages along with very high rates of co-occurring psychiatric  
16  
17 318 conditions underscore the interconnectedness of diseases of despair with overall well-being, and  
18  
19 319 the importance of considering reciprocal interrelationships among these conditions in prevention  
20  
21 320 and intervention efforts.

22  
23  
24  
25  
26 321 The relative increases in specific diagnoses seen in infants, youth, and young adults were  
27  
28 322 also striking. Among infants, the prevalence of substance-related diagnoses doubled over the  
29  
30 323 course of follow-up. This increase was entirely attributable to neonatal abstinence syndrome and  
31  
32 324 corresponds closely with increases in substance-related disorders among women of childbearing  
33  
34 325 age. Neonatal abstinence syndrome could be argued to be the direct result of a disease of despair  
35  
36 326 among mothers, and was therefore included. In addition, the prevalence of suicide ideation and  
37  
38 327 behaviors among youth and young adults at least tripled over the course of follow-up. These  
39  
40 328 findings underscore the importance of targeting vulnerable subpopulations in tailored prevention  
41  
42 329 and early intervention services.

43  
44  
45  
46 330 A recent study by Gaydos et al. used nationally representative longitudinal data to  
47  
48 331 examine diseases of despair and their age patterns from adolescence through the late-30s from  
49  
50 332 1994-2017.<sup>26</sup> This study demonstrated increases as the cohort aged into their late 30s, across  
51  
52 333 racial and ethnic groups as well as geographic locales. In addition to broadening original views  
53  
54  
55  
56  
57  
58  
59  
60

1  
2  
3 334 beyond impacting whites in rural locales, the generalized increases in despair documented  
4  
5 335 among this younger cohort forewarn further likely increases in mid-life mortality in the coming  
6  
7 336 decades. Such trends are already beginning to be observed at the population level in the U.S.  
8  
9  
10 337 Researchers examining declining life expectancy using data from the US Mortality Database and  
11  
12 338 CDC WONDER have recently established that increased death rates among people in midlife are  
13  
14 339 in fact extending beyond the original demographic characterized by Case & Deaton to all racial  
15  
16 340 and ethnic groups, as well as to suburbs and cities (with the largest relative increases occurring in  
17  
18 341 the Ohio Valley and New England).<sup>27</sup> As these and other findings expand the original deaths of  
19  
20 342 despair phenomenon across demographic and geographic boundaries it strengthens the  
21  
22 343 aforementioned hypothesis that the crisis is systemically linked to material changes in the US  
23  
24 344 political-economy that have broadly affected the working class over the last several decades.  
25  
26 345 Thus, while a better understanding of the clinical manifestation of diseases of despair may  
27  
28 346 inform efforts at intervention and mitigation, it must be acknowledged that the ultimate public  
29  
30 347 health goal must be addressing structural root causes of despair.

31  
32  
33 348 The concept of despair remains largely unstudied, with manifestations in cognitive,  
34  
35 349 emotional, behavioral, and biological domains as well as in social and political-economic  
36  
37 350 contexts.<sup>17</sup> For example, Gleib et al characterized despair by social and psychological dysfunction  
38  
39 351 such as a lack of purpose in life, a sense of worthlessness, little hope or goals for the future, and  
40  
41 352 perceived social rejection by broader society.<sup>5</sup> Shanahan et. al provided a roadmap for studying  
42  
43 353 the social contexts that can further strengthen or weaken pathways to despair. Ultimately, as  
44  
45 354 influencing the root causes of the crisis (i.e. societal structures that perpetuate socioeconomic  
46  
47 355 disadvantage) will be a politically-daunting endeavor, there may be shorter-term benefit in  
48  
49 356 improving the healthcare system's ability to measure and clinically screen for despair, as  
50  
51  
52  
53  
54  
55  
56  
57  
58  
59  
60

1  
2  
3 357 opposed to resultant diseases or deaths. Better processes for systemically identifying and  
4  
5 358 tracking despair may allow for clinical interventions to help mitigate progression to despair-  
6  
7 359 related mortality.<sup>28</sup>  
8  
9

### 10 360 *Strengths and Limitations*

11  
12 361 A significant strength of the current study is the investigation of the upstream diagnoses  
13  
14 362 for deaths of despair in a large cohort with representation of some of the most impacted states,  
15  
16 363 including West Virginia and Pennsylvania. Further, the use of a large claims-based dataset  
17  
18 364 provides insight into health insurance type as a consideration in the development of future  
19  
20 365 potential healthcare interventions. Finally, these data provide information on current diagnosis  
21  
22 366 rates in the context of long-term trends. A limitation of the current study is the incomplete nature  
23  
24 367 of social determinants of health data in administrative health records. Despite the significant  
25  
26 368 influence of these factors on health outcomes, few sources provide data that includes both  
27  
28 369 clinical and social and behavioral factors. To address this gap in clinical records, the Institute of  
29  
30 370 Medicine Committee on Recommended Social and Behavioral Domains and Measures for  
31  
32 371 Electronic Health Records describes a concise panel of standard measures in every patient's  
33  
34 372 electronic health record.<sup>29</sup> These measures include items evaluating depression, alcohol use, and  
35  
36 373 social connection or isolation which would help capture diagnoses of despair. Future research  
37  
38 374 might consider combining clinical records with data originating outside of claims and electronic  
39  
40 375 health records, including direct and indirect measures of social determinants.  
41  
42  
43  
44  
45

46 376 By definition, diagnoses of diseases of despair and health insurance enrollment imply  
47  
48 377 access to health care, although it is clear additional barriers to treatment exist. Insurance type is  
49  
50 378 an important predictor of disease diagnoses, and diseases of despair are no exception. Individuals  
51  
52 379 with Medicare, for example, have 1.5 times higher odds of having a diagnosis of a disease of  
53  
54  
55  
56  
57  
58  
59  
60

1  
2  
3 380 despair, followed by those with ACA (1.3 times higher odds). Insurance status is frequently used  
4  
5 381 as a surrogate for measures of socioeconomic status, which are essential to describing health  
6  
7 382 inequalities. Unfortunately, this is an imperfect proxy.<sup>30</sup> Employer-sponsored insurance suggests  
8  
9 383 the presence of stable household income, yet the nature of coverage and cost sharing  
10  
11 384 responsibilities of patients vary widely across insurance plans. Further, while expanded  
12  
13 385 insurance coverage under the Affordable Care Act has reduced socioeconomic disparities in  
14  
15 386 healthcare access,<sup>31</sup> significant barriers remain. Ultimately, that an estimated 87 million working  
16  
17 387 adults in the US are uninsured or underinsured<sup>32</sup> remains a major structural challenge for both  
18  
19 388 understanding the true scope of the diseases of despair crisis and mounting clinical programs to  
20  
21 389 ensure effective treatment.  
22  
23  
24  
25

#### 26 390 *Directions for future research*

27  
28 391 Identifying diseases of despair is critical for interrupting their progression towards deaths  
29  
30 392 of despair, but diagnoses do not necessarily guarantee the provision of appropriate and adequate  
31  
32 393 care for acute problems or general wellbeing. Thus, future research may build upon these  
33  
34 394 findings by quantifying treatment following disease identification, and linking this treatment to  
35  
36 395 longer-term morbidity and mortality. Relatedly, while results from the present study suggest  
37  
38 396 strong associations between diseases of despair and both physical and mental health  
39  
40 397 comorbidities, additional research may build on these exploratory findings in multiple ways.  
41  
42 398 First, identifying the clinical correlates of diseases of despair may present opportunities to  
43  
44 399 improve their timely detection through targeted screening. In addition, integrated approaches to  
45  
46 400 treatment that holistically target a range of physical and mental health symptoms may have  
47  
48 401 improved efficacy. It is likely that health systems that work with vulnerable populations (e.g.  
49  
50 402 residents of rural and remote regions, low-income adolescents, etc.) may need to co-design  
51  
52  
53  
54  
55  
56  
57  
58  
59  
60

1  
2  
3 403 primary, secondary, and tertiary interventions aimed at addressing diseases of despair. Such  
4  
5 404 interventions may require a wider array of community partners than are typically included in  
6  
7  
8 405 conventional health services. Developing and evaluating effective organizational partnerships  
9  
10 406 and best practices in integrated care of patients with diseases of despair would be a valuable  
11  
12 407 contribution.

14 408 Future inquiry could benefit from similar “big data” approaches to understand and model  
15  
16 409 patterns of despair in human populations. For instance, it would be useful to identify “hot-spots”  
17  
18  
19 410 of high prevalence/incidence of diseases of despair diagnoses (and deaths of despair) and  
20  
21 411 examine the socioeconomic conditions in these areas over time. As mentioned, research is  
22  
23 412 increasingly—if somewhat inscrutably—linking mortality with prolonged stagnant or declining  
24  
25 413 socioeconomic conditions. These conditions are associated with decades of globalization, rising  
26  
27 414 automation, and austerity policies (i.e. cuts in social spending) that have exacerbated economic  
28  
29 415 precariousness and despair. Notably, researchers have recently established a direct association  
30  
31 416 between automotive assembly plant closures in 112 manufacturing counties located primarily in  
32  
33 417 the US South and Midwest and an 85% surge in opioid overdose mortality rates among working-  
34  
35 418 age adults five years later.<sup>33</sup> Others have, for instance, linked rising rates of death of despair with  
36  
37 419 stagnant minimum wage).<sup>34-36</sup>

42 420 However, others argue that the phenomenon is more attributable to other contextual  
43  
44 421 factors such as: a worsening drug environment;<sup>37-39</sup> the collapse of social institutions and  
45  
46 422 weakening of traditional social bonds (e.g. reduced church attendance,<sup>40,41</sup> union membership,<sup>42</sup>  
47  
48 423 etc.);<sup>43</sup> hospital closures and shortages (particularly in rural areas)<sup>44</sup>; a generalized cultural rise in  
49  
50 424 loneliness, depression, alienation, and anxiety;<sup>45</sup> higher relative gun ownership in rural areas;<sup>46</sup>  
51  
52  
53 425 racial resentment and a growing sense of social status loss<sup>47</sup> among poor whites; and moral

1  
2  
3 426 decadence (i.e. a “loss of virtue” in ethnically white rural communities).<sup>48</sup> Using big data to build  
4  
5 427 predictive models of neighborhoods or census tracts where people may be at greatest risk would  
6  
7  
8 428 not only help clarify current debates about past causation and identify zones of resilience, but  
9  
10 429 also offer a future tool of clinical and public health import.

11  
12 430         Researchers might also undertake qualitative and/or mixed methods inquiry to examine  
13  
14 431 subjective perceptions of despair in high prevalence communities. There may be particular value  
15  
16 432 in engaging leaders of community and social service organizations (e.g., libraries, emergency  
17  
18 433 rooms, methadone treatment centers, suicide prevention organizations, homeless shelters,  
19  
20 434 Women, Infants, and Children (WIC) clinics, legal services organizations, state police,  
21  
22 435 community centers, county health services, and places of worship, etc.) who interface with high-  
23  
24 436 risk populations, as well as affected persons and family members. It would be especially useful  
25  
26 437 to better understand general awareness of the diseases of despair concept, local beliefs about  
27  
28 438 causation, perceptions of effective policy solutions at the local, state, and national levels, and  
29  
30 439 strategies hospitals can use to most effectively intervene. Moreover, as the COVID-19 pandemic  
31  
32 440 contracts domestic and global economies and requires the implementation of social/physical  
33  
34 441 distancing regimes, it will be important for researchers to examine how and in what ways  
35  
36 442 diseases of despair are affected by prolonged isolation, loss of jobs/benefits, diminution of social  
37  
38 443 protections, lack of mental health care, drug abuse, increased domestic abuse, and other societal  
39  
40 444 consequences of the virus. Given the complexity of despair, combining quantitative and  
41  
42 445 qualitative approaches may be particularly useful.  
43  
44  
45  
46  
47  
48  
49  
50  
51  
52  
53  
54  
55  
56  
57  
58  
59  
60

1  
2  
3 **449 Contributorship statement:**

4 450 Study concept and design: All authors

5 451 Acquisition, analysis, or interpretation of data: Brignone, George, Gladden, Katz, Kraschnewski,  
6 452 Sinoway

7 453 Drafting of the manuscript: Brignone, George, Kraschnewski

8 454 Critical revision of the manuscript for important intellectual content: All authors

9 455 Statistical analysis: Brignone

10 456 Administrative, technical, or material support: Murray, Sauder

11 457 Study supervision: Gladden, Sinoway

12 458

13 459 **Funding statement:**

14 460 The project described was supported by the National Center for Advancing Translational  
15 461 Sciences, National Institutes of Health, through Grant UL1 TR002014 and administrative  
16 462 supplement UL1 TR002014-03S1. The content is solely the responsibility of the authors and  
17 463 does not necessarily represent the official views of the NIH.

18 464

19 465 **Competing interests statement:**

20 466 The authors have no competing interests to disclose.

21 467

22 468 **Data sharing statement:**

23 469 Due to privacy laws, data cannot be made publicly available.

24 470

25 471 **Acknowledgements:**

26 472 Jonathon Johnson, MA, MS, Center for Rural Pennsylvania

27 473

28 474

29

30

31

32

33

34

35

36

37

38

39

40

41

42

43

44

45

46

47

48

49

50

51

52

53

54

55

56

57

58

59

60

475 **References**

- 476 1. Murphy SL, Xu J, Kochanek KD, Arias E. Mortality in the United States, 2017. NCHS  
477 Data Brief 2018:1-8.
- 478 2. Woolf SH, Schoomaker H, Hill L, Orndahl CM. The social determinants of health and  
479 the decline in U.S. life expectancy: implications for Appalachia. *J Appalach Health*  
480 2019;1:6-14.
- 481 3. Case A, Deaton A. Mortality and morbidity in the 21(st) century. *Brookings Pap Econ*  
482 *Act*;2017:397-476.
- 483 4. Case A, Deaton A. Rising morbidity and mortality in midlife among white non-Hispanic  
484 Americans in the 21st century. *Proc Natl Acad Sci U S A* 2015;112:15078-83.
- 485 5. Glei DA, Goldman N, Weinstein M. A growing socioeconomic divide: Effects of the  
486 Great Recession on perceived economic distress in the United States. *PLoS One*  
487 2019;14:e0214947.
- 488 6. Wisman JD. Wage stagnation, rising inequality and the financial crisis of 2008.  
489 *Cambridge Journal of Economics* 2013;37:921-45.
- 490 7. Allred C. Marriage: More than a century of change, 1900-2016. *Family Profiles, FP-18-*  
491 *17. Bowling Green State University, OH: National Center for Family & Marriage*  
492 *Research; 2018.*
- 493 8. Livingston G. About one-third of U.S. children are living with an unmarried parent.  
494 Available at: [https://www.pewresearch.org/fact-tank/2018/04/27/about-one-third-of-u-s-](https://www.pewresearch.org/fact-tank/2018/04/27/about-one-third-of-u-s-children-are-living-with-an-unmarried-parent/)  
495 [children-are-living-with-an-unmarried-parent/](https://www.pewresearch.org/fact-tank/2018/04/27/about-one-third-of-u-s-children-are-living-with-an-unmarried-parent/). Pew Research Center Fact Tank 2018.
- 496 9. Hipple SF. Labor force participation: what has happened since the peak? Available at:  
497 <https://www.bls.gov/opub/mlr/2016/article/labor-force-participation-what-has-happened->



- 1  
2  
3 498 [since-the-peak.htm](#). Monthly Labor Review, US Bureau of Labor Statistics 2016  
4  
5 499 (September).  
6  
7  
8 500 10. Marmot M. Social causes of the slowdown in health improvement. J Epidemiol  
9  
10 501 Community Health 2018;72:359-60.  
11  
12 502 11. Scutchfield FD, Keck CW. Deaths of Despair: Why? What to Do? Am J Public Health  
13  
14 503 2017;107:1564-5.  
15  
16  
17 504 12. Stein EM, Gennuso KP, Ugboaja DC, Remington PL. The Epidemic of Despair Among  
18  
19 505 White Americans: Trends in the Leading Causes of Premature Death, 1999-2015. Am J  
20  
21 506 Public Health 2017;107:1541-7.  
22  
23  
24 507 13. Dodge KA, Price JM, Bachorowski JA, Newman JP. Hostile attributional biases in  
25  
26 508 severely aggressive adolescents. J Abnorm Psychol 1990;99:385-92.  
27  
28  
29 509 14. McEwen BS, Seeman T. Protective and damaging effects of mediators of stress.  
30  
31 510 Elaborating and testing the concepts of allostasis and allostatic load. Ann N Y Acad Sci  
32  
33 511 1999;896:30-47.  
34  
35  
36 512 15. Pulcu E, Trotter PD, Thomas EJ, et al. Temporal discounting in major depressive  
37  
38 513 disorder. Psychol Med 2014;44:1825-34.  
39  
40  
41 514 16. Raison CL, Capuron L, Miller AH. Cytokines sing the blues: inflammation and the  
42  
43 515 pathogenesis of depression. Trends Immunol 2006;27:24-31.  
44  
45 516 17. Shanahan L, Hill SN, Gaydos LM, et al. Does Despair Really Kill? A Roadmap for an  
46  
47 517 Evidence-Based Answer. Am J Public Health 2019;109:854-8.  
48  
49 518 18. Meit M, Hefferman M, Tanenbaum E, Hoffmann T. Final Report: Appalachian Diseases  
50  
51 519 of Despair. Bethesda, MD: Walsh Center for Rural Health Analysis, NORC at the  
52  
53 520 University of Chicago; 2017.  
54  
55  
56  
57  
58  
59  
60

- 1  
2  
3 521 19. Woolf SH, Chapman DA, Buchanich JM, Bobby KJ, Zimmerman EB, Blackburn SM.  
4  
5 522 Changes in midlife death rates across racial and ethnic groups in the United States:  
6  
7 523 systematic analysis of vital statistics. *BMJ* 2018;362:k3096.  
8  
9  
10 524 20. Clinical Classifications Software (CCS). Healthcare Cost and Utilization Project  
11  
12 525 (HCUP). 2006-2009. Agency for Healthcare Research and Quality. Available at:  
13  
14 526 [www.hcup-us.ahrq.gov/toolssoftware/ccs/ccs.jsp](http://www.hcup-us.ahrq.gov/toolssoftware/ccs/ccs.jsp).  
15  
16  
17 527 21. Quan H, Sundararajan V, Halfon P, et al. Coding algorithms for defining comorbidities in  
18  
19 528 ICD-9-CM and ICD-10 administrative data. *Med Care* 2005;43:1130-9.  
20  
21 529 22. Derrick B, Dobson-Mckittrick A, Toher D, White P. Test statistics for comparing two  
22  
23 530 proportions with partially overlapping samples. *Journal of Applied Quantitative Methods*  
24  
25 531 2015;10.  
26  
27  
28 532 23. R Core Team. R: A language and environment for statistical computing. R Foundation  
29  
30 533 for Statistical Computing, Vienna, Austria. Available online at: [https://www.R-](https://www.R-project.org/)  
31  
32 534 [project.org/](https://www.R-project.org/). 2018.  
33  
34  
35 535 24. Case A, Deaton A. Deaths of despair and the future of capitalism. Princeton: Princeton  
36  
37 536 University Press; 2020.  
38  
39  
40 537 25. Dyer O. Declining US life expectancy is driven by more than just opioids, study finds.  
41  
42 538 *BMJ* 2019;367:l6753.  
43  
44  
45 539 26. Gaydos L, Hummer RA, Hargrove TW, et al. The Depths of Despair Among US Adults  
46  
47 540 Entering Midlife. *Am J Public Health* 2019;109:774-80.  
48  
49 541 27. Woolf SH, Schoomaker H. Life Expectancy and Mortality Rates in the United States,  
50  
51 542 1959-2017. *JAMA* 2019;322:1996-2016.  
52  
53  
54  
55  
56  
57  
58  
59  
60

- 1  
2  
3 543 28. Marmot M, Bell R. Social determinants and non-communicable diseases: time for  
4  
5 544 integrated action. *BMJ* 2019;364:l251.  
6  
7  
8 545 29. Adler NE, Stead WW. Patients in context--EHR capture of social and behavioral  
9  
10 546 determinants of health. *N Engl J Med* 2015;372:698-701.  
11  
12 547 30. Casey JA, Pollak J, Glymour MM, Mayeda ER, Hirsch AG, Schwartz BS. Measures of  
13  
14 548 SES for Electronic Health Record-based Research. *Am J Prev Med* 2018;54:430-9.  
15  
16  
17 549 31. Griffith K, Evans L, Bor J. The Affordable Care Act Reduced Socioeconomic Disparities  
18  
19 550 In Health Care Access. *Health Aff (Millwood)* 2017.  
20  
21  
22 551 32. Collins SR, Gunja MZ. Findings from the Commonwealth Fund Health Insurance in  
23  
24 552 America Survey, March–June 2019.  
25  
26 553 [americans-think-health-coverage-2020-election](https://www.commonwealthfund.org/publications/issue-briefs/2019/sep/what-do-<br/>27<br/>28 554 <a href=). 2019.  
29  
30  
31 555 33. Venkataramani AS, Bair EF, O'Brien RL, Tsai AC. Association Between Automotive  
32  
33 556 Assembly Plant Closures and Opioid Overdose Mortality in the United States: A  
34  
35 557 Difference-in-Differences Analysis. *JAMA Intern Med* 2019;180:254-62.  
36  
37  
38 558 34. Dow WH, Godøy A, Lowenstein CA, Reich M. Can Economic Policies Reduce Deaths  
39  
40 559 of Despair? IRLE Working Paper No. 104-19. [Economic-Policies-Reduce-Deaths-of-Despair.pdf](http://irle.berkeley.edu/files/2019/04/Can-<br/>41<br/>42 560 <a href=). 2019.  
43  
44  
45 561 35. Gertner AK, Rotter JS, Shafer PR. Association between state minimum wages and  
46  
47 562 suicide rates in the US. *Am J Prev Med* 2019;56:648-54.  
48  
49 563 36. Kaufman JA, Salas-Hernandez LK, Komro KA, Livingston MD. Effects of increased  
50  
51 564 minimum wages by unemployment rate on suicide in the USA. *J Epidemiol Community  
52  
53 565 Health* 2020;74:219-24.  
54  
55  
56  
57  
58  
59  
60

- 1  
2  
3 566 37. The Numbers Behind the Opioid Crisis, Prepared by the Vice Chairman's Staff of the  
4  
5 567 Joint Economic Committee at the request of Senator Mike Lee. Available at:  
6  
7  
8 568 [https://www.lee.senate.gov/public/\\_cache/files/b54a2abb-978d-4bbb-a868-](https://www.lee.senate.gov/public/_cache/files/b54a2abb-978d-4bbb-a868-531cdfaeae7a/the-numbers-behind-the-opioid-crisis-final.pdf)  
9  
10 569 [531cdfaeae7a/the-numbers-behind-the-opioid-crisis-final.pdf](https://www.lee.senate.gov/public/_cache/files/b54a2abb-978d-4bbb-a868-531cdfaeae7a/the-numbers-behind-the-opioid-crisis-final.pdf). 2017 (November).  
11  
12 570 38. Masters RK, Tilstra AM, Simon DH. Mortality from Suicide, Chronic Liver Disease, and  
13  
14 571 Drug Poisonings among Middle-Aged U.S. White Men and Women, 1980-2013.  
15  
16 572 *Biodemography Soc Biol* 2017;63:31-7.  
17  
18 573 39. Ruhm CJ. Deaths of Despair or Drug Problems? National Bureau of Economic Research;  
19  
20 574 doi:10.3386/w24188; Available at <https://www.nber.org/papers/w24188.pdf>. 2018.  
21  
22 575 40. Li S, Stampfer MJ, Williams DR, VanderWeele TJ. Association of Religious Service  
23  
24 576 Attendance With Mortality Among Women. *JAMA Intern Med* 2016;176:777-85.  
25  
26 577 41. Chen Y, Koh HK, Kawachi I, Botticelli M, VanderWeele TJ. Religious Service  
27  
28 578 Attendance and Deaths Related to Drugs, Alcohol, and Suicide Among US Health Care  
29  
30 579 Professionals. *JAMA Psychiatry* 2020. (Published online)  
31  
32 580 doi:10.1001/jamapsychiatry.2020.0175  
33  
34 581 42. Eisenberg-Guyot J, Mooney SJ, Hagopian A, Barrington WE, Hajat A. Solidarity and  
35  
36 582 disparity: Declining labor union density and changing racial and educational mortality  
37  
38 583 inequities in the United States. *Am J Ind Med* 2020;63:218-31.  
39  
40 584 43. Opportunity America. Work, Skills, Community. Restoring opportunity for the working  
41  
42 585 class. Available at: [http://opportunityamericaonline.org/wp-](http://opportunityamericaonline.org/wp-content/uploads/2018/10/WCG-final_web.pdf)  
43  
44 586 [content/uploads/2018/10/WCG-final\\_web.pdf](http://opportunityamericaonline.org/wp-content/uploads/2018/10/WCG-final_web.pdf). 2018.  
45  
46 587 44. Probst J, Eberth JM, Crouch E. Structural Urbanism Contributes To Poorer Health  
47  
48 588 Outcomes For Rural America. *Health Aff (Millwood)* 2019;38:1976-84.  
49  
50  
51  
52  
53  
54  
55  
56  
57  
58  
59  
60

- 1  
2  
3 589 45. Smith EE. Blame a 'loneliness epidemic' for risks to nation's well-being. Available at:  
4  
5 590 [https://thehill.com/opinion/civil-rights/385785-americas-loneliness-epidemic-driven-by-](https://thehill.com/opinion/civil-rights/385785-americas-loneliness-epidemic-driven-by-a-crisis-of-meaning)  
6  
7 [a-crisis-of-meaning](https://thehill.com/opinion/civil-rights/385785-americas-loneliness-epidemic-driven-by-a-crisis-of-meaning). The Hill 2018.  
8 591  
9  
10 592 46. Rapaport L. Strict state gun laws linked to fewer suicides and murders. Available at  
11  
12 593 [https://www.reuters.com/article/us-health-firearms-suicides/strict-state-gun-laws-linked-](https://www.reuters.com/article/us-health-firearms-suicides/strict-state-gun-laws-linked-to-fewer-suicides-and-murders-idUSKBN1GH39W)  
13  
14 [to-fewer-suicides-and-murders-idUSKBN1GH39W](https://www.reuters.com/article/us-health-firearms-suicides/strict-state-gun-laws-linked-to-fewer-suicides-and-murders-idUSKBN1GH39W). Reuters 2018.  
15 594  
16  
17 595 47. Siddiqi A, Sod-Erdene O, Hamilton D, Cottom TM, Darity W, Jr. Growing sense of  
18  
19 596 social status threat and concomitant deaths of despair among whites. *SSM Popul Health*  
20  
21 597 2019;9:100449.  
22  
23  
24 598 48. Vance JD. *Hillbilly Elegy*. New York, NY: Harper Collins; 2016.  
25  
26 599  
27  
28 600

**Table 1.** Descriptive Statistics for Study Cohort, Overall and Stratified by the Presence of Disease of Despair (DoD) Diagnosis at any Point during Follow up, 2007 – 2018.

|                            | <b>Overall</b><br>N = 12,144,252<br>(100.0%) | <b>No DoD</b><br>N = 11,628,422<br>(95.8%) | <b>DoD</b><br>N = 515,830<br>(4.2%) | <i>p</i> -value |
|----------------------------|----------------------------------------------|--------------------------------------------|-------------------------------------|-----------------|
|                            | N (%) / M (SD)                               |                                            |                                     |                 |
| Type of DoD Diagnosis      |                                              |                                            |                                     |                 |
| Alcohol-related            | 278,309 (2.3%)                               | -                                          | 278,309 (54.0%)                     |                 |
| Drug-related               | 228,227 (1.9%)                               | -                                          | 228,227 (44.2%)                     |                 |
| Suicide Ideation/Behavior  | 84,117 (0.7%)                                | -                                          | 84,117 (16.3%)                      |                 |
| Multiple Diagnosis Types   | 66,585 (0.5%)                                | -                                          | 66,585 (12.9%)                      |                 |
| Gender                     |                                              |                                            |                                     | <.001           |
| Women                      | 6,124,183 (50.4%)                            | 5,909,902 (50.8%)                          | 214,281 (41.5%)                     |                 |
| Men                        | 6,020,069 (49.6%)                            | 5,718,520 (49.2%)                          | 301,549 (58.5%)                     |                 |
| Age at Enrollment Midpoint |                                              |                                            |                                     | <.001           |
| 0 – 17 years               | 2,666,135 (22%)                              | 2,625,797 (22.6%)                          | 40,338 (7.8%)                       |                 |
| 18 – 25 years              | 1,539,995 (12.7%)                            | 1,456,629 (12.5%)                          | 83,366 (16.2%)                      |                 |
| 26 – 35 years              | 1,752,493 (14.4%)                            | 1,677,395 (14.4%)                          | 75,098 (14.6%)                      |                 |
| 36 – 45 years              | 1,638,938 (13.5%)                            | 1,560,822 (13.4%)                          | 78,116 (15.1%)                      |                 |
| 46 – 55 years              | 1,754,037 (14.4%)                            | 1,659,732 (14.3%)                          | 94,305 (18.3%)                      |                 |
| 56 – 65 years              | 1,628,179 (13.4%)                            | 1,547,308 (13.3%)                          | 80,871 (15.7%)                      |                 |
| 66 – 75 years              | 586,303 (4.8%)                               | 552,101 (4.7%)                             | 34,202 (6.6%)                       |                 |
| 76 – 85 years              | 366,120 (3%)                                 | 345,023 (3%)                               | 21,097 (4.1%)                       |                 |
| 85+ years                  | 212,052 (1.7%)                               | 203,615 (1.8%)                             | 8,437 (1.6%)                        |                 |
| Number of Years Enrolled   | 4.8 (3.4)                                    | 4.7 (3.4)                                  | 6.6 (3.4)                           | <.001           |
| Most Recent Enrollment     |                                              |                                            |                                     | <.001           |
| 2007 – 2009                | 1,467,763 (12.1%)                            | 1,440,453 (12.4%)                          | 27,310 (5.3%)                       |                 |
| 2010 – 2012                | 1,796,257 (14.8%)                            | 1,739,269 (15%)                            | 56,988 (11.0%)                      |                 |
| 2013 – 2015                | 2,528,619 (20.8%)                            | 2,421,676 (20.8%)                          | 106,943 (20.7%)                     |                 |
| 2016 – 2018                | 6,351,613 (52.3%)                            | 6,027,024 (51.8%)                          | 324,589 (62.9%)                     |                 |
| Medical Insurance Type     |                                              |                                            |                                     | <.001           |
| Employer Sponsored         | 9,516,477 (78.4%)                            | 9,105,741 (78.3%)                          | 410,736 (79.6%)                     |                 |
| ACA                        | 354,355 (2.9%)                               | 340,900 (2.9%)                             | 13,455 (2.6%)                       |                 |
| Medicare                   | 752,594 (6.2%)                               | 699,619 (6%)                               | 52,975 (10.3%)                      |                 |
| Other                      | 1,520,825 (12.5%)                            | 1,482,161 (12.7%)                          | 38,664 (7.5%)                       |                 |

Notes: If there were multiple values on file for state or type of insurance, the value covering longest period was selected. ACA plans were available 2014-2018.

601  
602  
603  
604  
605  
606  
607  
608

1  
2  
3  
4  
5  
6  
7  
8  
9  
10  
11  
12  
13  
14  
15  
16  
17  
18  
19  
20  
21  
22  
23  
24  
25  
26  
27  
28  
29  
30  
31  
32  
33  
34  
35  
36  
37  
38  
39  
40  
41  
42  
43  
44  
45  
46  
47  
48  
49  
50  
51  
52  
53  
54  
55  
56  
57  
58  
59  
60

609 *Figure 1. Age and Gender-Specific Diagnostic Prevalence Rates of Diseases of Despair, 2009 –*  
610 *2018.*

611  
612 [attached separately]

613  
614  
615  
616

For peer review only

617

**Table 2.** Comparison of Age and Gender Specific Annual Incidence of Disease of Despair Diagnoses, 2009 – 2018.

| Age Cohort                       | Men   |       |                 |             | Women |       |                 |             |
|----------------------------------|-------|-------|-----------------|-------------|-------|-------|-----------------|-------------|
|                                  | 2009  | 2018  | <i>p</i> -value | Ratio       | 2009  | 2018  | <i>p</i> -value | Ratio       |
| Any Disease of Despair Diagnosis |       |       |                 |             |       |       |                 |             |
| > 1 Year                         | .25%  | .52%  | <.001           | <b>2.05</b> | .17%  | .36%  | .001            | <b>2.18</b> |
| 1 - 17 Years                     | .28%  | .38%  | <.001           | <b>1.37</b> | .27%  | .53%  | <.001           | <b>1.96</b> |
| 18 - 34 Years                    | 1.44% | 1.73% | <.001           | <b>1.21</b> | .94%  | 1.42% | <.001           | <b>1.51</b> |
| 35-54 Years                      | 1.21% | 1.58% | <.001           | <b>1.30</b> | .72%  | 1.01% | <.001           | <b>1.40</b> |
| 55-74 Years                      | 1.08% | 1.61% | <.001           | <b>1.48</b> | .53%  | .95%  | <.001           | <b>1.78</b> |
| 75+ Years                        | .99%  | 1.23% | <.001           | <b>1.25</b> | .69%  | .85%  | <.001           | <b>1.23</b> |
| Alcohol-Related Diagnosis        |       |       |                 |             |       |       |                 |             |
| > 1 Year                         | .03%  | .03%  | 1.000           | .90         | .00%  | .01%  | .951            | -           |
| 1 - 17 Years                     | .09%  | .05%  | <.001           | <b>.60</b>  | .09%  | .04%  | <.001           | <b>.49</b>  |
| 18 - 34 Years                    | .93%  | .97%  | .103            | 1.05        | .45%  | .56%  | <.001           | <b>1.26</b> |
| 35-54 Years                      | .90%  | 1.03% | <.001           | <b>1.15</b> | .36%  | .44%  | <.001           | <b>1.22</b> |
| 55-74 Years                      | .84%  | 1.11% | <.001           | <b>1.32</b> | .26%  | .42%  | <.001           | <b>1.60</b> |
| 75+ Years                        | .63%  | .76%  | .003            | <b>1.19</b> | .24%  | .25%  | .932            | 1.07        |
| Substance-Related Diagnosis      |       |       |                 |             |       |       |                 |             |
| > 1 Year                         | .23%  | .49%  | <.001           | <b>2.14</b> | .17%  | .36%  | <.001           | <b>2.14</b> |
| 1 - 17 Years                     | .14%  | .08%  | <.001           | <b>0.58</b> | .11%  | .05%  | <.001           | <b>0.47</b> |
| 18 - 34 Years                    | .57%  | .72%  | <.001           | <b>1.26</b> | .44%  | .58%  | <.001           | <b>1.33</b> |
| 35-54 Years                      | .37%  | .58%  | <.001           | <b>1.59</b> | .34%  | .50%  | <.001           | <b>1.50</b> |
| 55-74 Years                      | .26%  | .51%  | <.001           | <b>2.00</b> | .24%  | .49%  | <.001           | <b>2.04</b> |
| 75+ Years                        | .32%  | .37%  | .117            | 1.16        | .39%  | .46%  | <.001           | <b>1.20</b> |
| Suicide-Related Diagnosis        |       |       |                 |             |       |       |                 |             |
| > 1 Year                         | -     | -     | -               | -           | -     | -     | -               | -           |
| 1 - 17 Years                     | .09%  | .28%  | <.001           | <b>3.20</b> | .13%  | .47%  | <.001           | <b>3.77</b> |
| 18 - 34 Years                    | .14%  | .42%  | <.001           | <b>2.95</b> | .19%  | .52%  | <.001           | <b>2.69</b> |
| 35-54 Years                      | .09%  | .15%  | <.001           | <b>1.81</b> | .13%  | .20%  | <.001           | <b>1.52</b> |
| 55-74 Years                      | .06%  | .13%  | <.001           | <b>2.23</b> | .07%  | .13%  | <.001           | <b>1.75</b> |
| 75+ Years                        | .08%  | .16%  | <.001           | <b>2.09</b> | .08%  | .14%  | <.001           | <b>1.83</b> |

Notes: Ratios represent 2018 rates relative to 2009 incidence rates. Bolded ratios correspond to statistically significant differences in diagnostic incidence.

618  
619  
620  
621  
622  
623  
624



**Table 3.** Comparison of Age and Gender Specific Annual Prevalence of Disease of Despair Diagnoses, 2009 – 2018.

| Age Cohort                       | Men   |       |                 |             | Women |       |                 |             |
|----------------------------------|-------|-------|-----------------|-------------|-------|-------|-----------------|-------------|
|                                  | 2009  | 2018  | <i>p</i> -value | Ratio       | 2009  | 2018  | <i>p</i> -value | Ratio       |
| Any Disease of Despair Diagnosis |       |       |                 |             |       |       |                 |             |
| > 1 Year                         | .25%  | .52%  | <.001           | <b>2.05</b> | .17%  | .36%  | <.001           | <b>2.18</b> |
| 1 - 17 Years                     | .33%  | .45%  | <.001           | <b>1.37</b> | .32%  | .65%  | <.001           | <b>2.04</b> |
| 18 - 34 Years                    | 1.93% | 2.66% | <.001           | <b>1.38</b> | 1.19% | 2.05% | <.001           | <b>1.71</b> |
| 35-54 Years                      | 1.72% | 2.68% | <.001           | <b>1.56</b> | 1.03% | 1.68% | <.001           | <b>1.63</b> |
| 55-74 Years                      | 1.55% | 2.72% | <.001           | <b>1.75</b> | .72%  | 1.59% | <.001           | <b>2.21</b> |
| 75+ Years                        | 1.27% | 1.89% | <.001           | <b>1.49</b> | 0.80% | 1.18% | <.001           | <b>1.46</b> |
| Alcohol-Related Diagnosis        |       |       |                 |             |       |       |                 |             |
| > 1 Year                         | .03%  | .03%  | 1.000           | 0.90        | .00%  | .01%  | 0.950           | -           |
| 1 - 17 Years                     | .10%  | .07%  | <.001           | <b>0.67</b> | .10%  | .05%  | <.001           | <b>0.53</b> |
| 18 - 34 Years                    | 1.12% | 1.30% | <.001           | <b>1.16</b> | .52%  | .72%  | <.001           | <b>1.37</b> |
| 35-54 Years                      | 1.23% | 1.54% | <.001           | <b>1.25</b> | .52%  | .68%  | <.001           | <b>1.29</b> |
| 55-74 Years                      | 1.23% | 1.85% | <.001           | <b>1.51</b> | .38%  | .69%  | <.001           | <b>1.84</b> |
| 75+ Years                        | 0.87% | 1.24% | <.001           | <b>1.43</b> | .31%  | .37%  | 0.140           | 1.17        |
| Substance-Related Diagnosis      |       |       |                 |             |       |       |                 |             |
| > 1 Year                         | .23%  | .49%  | <.001           | <b>2.14</b> | .17%  | .36%  | <.001           | <b>2.14</b> |
| 1 - 17 Years                     | .17%  | .09%  | <.001           | <b>0.57</b> | .13%  | .06%  | <.001           | <b>0.46</b> |
| 18 - 34 Years                    | .85%  | 1.30% | <.001           | <b>1.53</b> | .59%  | .96%  | <.001           | <b>1.62</b> |
| 35-54 Years                      | .53%  | 1.19% | <.001           | <b>2.24</b> | .48%  | .92%  | <.001           | <b>1.93</b> |
| 55-74 Years                      | .33%  | .88%  | <.001           | <b>2.70</b> | .30%  | .83%  | <.001           | <b>2.73</b> |
| 75+ Years                        | .35%  | .51%  | <.001           | <b>1.47</b> | .42%  | .67%  | <.001           | <b>1.59</b> |
| Suicide-Related Diagnosis        |       |       |                 |             |       |       |                 |             |
| > 1 Year                         | -     | -     | -               | -           | -     | -     | -               | -           |
| 1 - 17 Years                     | .09%  | .31%  | <.001           | <b>3.43</b> | .14%  | .58%  | <.001           | <b>4.17</b> |
| 18 - 34 Years                    | .15%  | .49%  | <.001           | <b>3.20</b> | .21%  | .64%  | <.001           | <b>3.03</b> |
| 35-54 Years                      | .09%  | .17%  | <.001           | <b>1.89</b> | .14%  | .23%  | <.001           | <b>1.60</b> |
| 55-74 Years                      | .06%  | .15%  | <.001           | <b>2.33</b> | .08%  | .15%  | <.001           | <b>1.88</b> |
| 75+ Years                        | .08%  | .17%  | <.001           | <b>2.11</b> | .09%  | .17%  | <.001           | <b>1.94</b> |

Notes: Ratios represent 2018 rates relative to 2009 prevalence rates. Bolded ratios correspond to statistically significant differences in diagnostic prevalence.

625  
626  
627  
628  
629  
630

**Table 4.** Risk for Disease of Despair Diagnosis as a Function of Demographic and Enrollment Characteristics, 2018.

| Variable                             | Any Disease of Despair                        |                     | Alcohol-Related Diagnosis |                     | Substance-Related Diagnosis |                     | Suicide-Related Diagnosis |                     |
|--------------------------------------|-----------------------------------------------|---------------------|---------------------------|---------------------|-----------------------------|---------------------|---------------------------|---------------------|
|                                      | Adjusted Odds Ratio (95% Confidence Interval) |                     |                           |                     |                             |                     |                           |                     |
| Men [ref = Women]                    | <b>1.49</b>                                   | <b>(1.47, 1.51)</b> | <b>2.35</b>               | <b>(2.30, 2.41)</b> | <b>1.23</b>                 | <b>(1.20, 1.25)</b> | <b>0.72</b>               | <b>(0.70, 0.75)</b> |
| Age [ref = 18-34]                    |                                               |                     |                           |                     |                             |                     |                           |                     |
| <1                                   | <b>0.18</b>                                   | <b>(0.15, 0.22)</b> | <b>0.02</b>               | <b>(0.01, 0.04)</b> | <b>0.37</b>                 | <b>(0.31, 0.44)</b> | -                         | -                   |
| 1-17                                 | <b>0.23</b>                                   | <b>(0.22, 0.24)</b> | <b>0.06</b>               | <b>(0.05, 0.06)</b> | <b>0.07</b>                 | <b>(0.06, 0.08)</b> | <b>0.79</b>               | <b>(0.75, 0.83)</b> |
| 35-54                                | <b>0.92</b>                                   | <b>(0.90, 0.94)</b> | <b>1.09</b>               | <b>(1.06, 1.13)</b> | <b>0.92</b>                 | <b>(0.90, 0.95)</b> | <b>0.35</b>               | <b>(0.33, 0.37)</b> |
| 55-74                                | <b>0.83</b>                                   | <b>(0.81, 0.84)</b> | <b>1.19</b>               | <b>(1.15, 1.22)</b> | <b>0.66</b>                 | <b>(0.64, 0.68)</b> | <b>0.21</b>               | <b>(0.20, 0.23)</b> |
| 75+                                  | <b>0.44</b>                                   | <b>(0.42, 0.46)</b> | <b>0.59</b>               | <b>(0.55, 0.63)</b> | <b>0.34</b>                 | <b>(0.31, 0.36)</b> | <b>0.15</b>               | <b>(0.13, 0.17)</b> |
| Insurance [ref = employer sponsored] |                                               |                     |                           |                     |                             |                     |                           |                     |
| ACA                                  | <b>1.30</b>                                   | <b>(1.24, 1.37)</b> | <b>1.37</b>               | <b>(1.28, 1.48)</b> | <b>1.33</b>                 | <b>(1.24, 1.42)</b> | 1.05                      | (0.91, 1.21)        |
| Medicare                             | <b>1.51</b>                                   | <b>(1.46, 1.55)</b> | <b>1.30</b>               | <b>(1.25, 1.36)</b> | <b>1.73</b>                 | <b>(1.65, 1.81)</b> | <b>2.19</b>               | <b>(1.98, 2.43)</b> |
| Other                                | <b>0.71</b>                                   | <b>(0.67, 0.74)</b> | <b>0.73</b>               | <b>(0.68, 0.78)</b> | <b>0.61</b>                 | <b>(0.57, 0.66)</b> | <b>0.84</b>               | <b>(0.77, 0.92)</b> |

Notes: Bold indicates statistical significance,  $p < .05$ .

631  
632  
633  
634  
635  
636  
637  
638  
639  
640

**Table 5.** Physical and Mental Health Comorbidities by Disease of Despair Diagnosis, Age, and Gender, 2018

|              | Charlson Comorbidity Weighted Score |                |          | Adjustment / Anxiety Disorders |                  |          | Mood Disorders    |                  |          | Schizophrenia and Other Psychotic Disorders |                |          |
|--------------|-------------------------------------|----------------|----------|--------------------------------|------------------|----------|-------------------|------------------|----------|---------------------------------------------|----------------|----------|
|              | No DoD                              | DoD            | <i>p</i> | No DoD                         | DoD              | <i>p</i> | No DoD            | DoD              | <i>p</i> | No DoD                                      | DoD            | <i>p</i> |
|              | Mean (SD)                           |                |          | N (%)                          |                  |          |                   |                  |          |                                             |                |          |
| <b>Men</b>   |                                     |                |          |                                |                  |          |                   |                  |          |                                             |                |          |
| <1           | .03<br>(.21)                        | .24<br>(.56)   | .001     | -                              | -                | -        | -                 | -                | -        | -                                           | -              | -        |
| 1-17         | .10<br>(.33)                        | .20<br>(0.62)  | <.001    | 20,980<br>(6.3%)               | 949<br>(63.9%)   | <.001    | 6,538<br>(2.0%)   | 1,022<br>(68.8%) | <.001    | 137<br>(0.0%)                               | 136<br>(9.2%)  | <.001    |
| 18-34        | .09<br>(.42)                        | .24<br>(.78)   | <.001    | 31,405<br>(8.8%)               | 4,340<br>(44.5%) | <.001    | 17,307<br>(4.9%)  | 3,980<br>(40.8%) | <.001    | 597<br>(0.2%)                               | 618<br>(6.3%)  | <.001    |
| 35-54        | .32<br>(.93)                        | .80<br>(1.66)  | <.001    | 49,603<br>(10.8%)              | 5,178<br>(41.1%) | <.001    | 26,333<br>(5.8%)  | 4,094<br>(32.5%) | <.001    | 556<br>(0.1%)                               | 260<br>(2.1%)  | <.001    |
| 55-74        | 1.1<br>(1.87)                       | 2.5<br>(2.94)  | <.001    | 39,191<br>(9.3%)               | 4,021<br>(34.0%) | <.001    | 27,685<br>(6.6%)  | 3,684<br>(31.2%) | <.001    | 1,016<br>(0.2%)                             | 294<br>(2.5%)  | <.001    |
| 75+          | 2.86<br>(2.8)                       | 3.00<br>(4.57) | <.001    | 10,126<br>(10.3%)              | 563<br>(31.0%)   | <.001    | 9,204<br>(9.4%)   | 639<br>(35.2%)   | <.001    | 672<br>(0.7%)                               | 89<br>(4.9%)   | <.001    |
| <b>Women</b> |                                     |                |          |                                |                  |          |                   |                  |          |                                             |                |          |
| <1           | .03<br>(.21)                        | .17<br>(.51)   | .044     | -                              | -                | -        | -                 | -                | -        | -                                           | -              | -        |
| 1-17         | .08<br>(.31)                        | .21<br>(0.50)  | <.001    | 25,099<br>(7.9%)               | 1,640<br>(78.7%) | <.001    | 9,545<br>(3.0%)   | 1,756<br>(84.2%) | <.001    | 88<br>(0.0%)                                | 214<br>(10.3%) | <.001    |
| 18-34        | .13<br>(.46)                        | .32<br>(0.77)  | <.001    | 67,210<br>(19.3%)              | 4,495<br>(61.7%) | <.001    | 38,526<br>(11.0%) | 4,318<br>(59.3%) | <.001    | 381<br>(.1%)                                | 407<br>(5.6%)  | <.001    |
| 35-54        | .36<br>(0.96)                       | .92<br>(1.72)  | <.001    | 101,708<br>(21.2%)             | 5,030<br>(61.4%) | <.001    | 64,072<br>(13.4%) | 4,475<br>(54.6%) | <.001    | 604<br>(.1%)                                | 294<br>(3.6%)  | <.001    |
| 55-74        | .93<br>(1.69)                       | 2.06<br>(2.62) | <.001    | 83,373<br>(18.4%)              | 4,015<br>(54.8%) | <.001    | 62,141<br>(13.7%) | 3,728<br>(50.9%) | <.001    | 1,243<br>(.3%)                              | 273<br>(3.7%)  | <.001    |
| 75+          | 2.28<br>(2.45)                      | 3.70<br>(3.0)  | <.001    | 29,101<br>(19.7%)              | 881<br>(53.4%)   | <.001    | 23,102<br>(15.6%) | 779<br>(47.2%)   | <.001    | 1,776<br>(1.2%)                             | 135<br>(8.2%)  | <.001    |

Notes: DoD = Diseases of Despair; *p*-values for Charlson scores correspond to *t*-tests; *p*-value for psychiatric comorbidities correspond to chi-square tests.

641

For peer review only

1  
2  
3  
4  
5  
6  
7  
8  
9  
10  
11  
12  
13  
14  
15  
16  
17  
18  
19  
20  
21  
22  
23  
24  
25  
26  
27  
28  
29  
30  
31  
32  
33  
34  
35  
36  
37  
38  
39  
40  
41  
42  
43  
44  
45  
46  
47



Figure 1

**The RECORD statement – checklist of items, extended from the STROBE statement, that should be reported in observational studies using routinely collected health data.**

|                           | Item No. | STROBE items                                                                                                                                                                               | Location in manuscript where items are reported | RECORD items                                                                                                                                                                                                                                                                                                                                                                                                                                | Location in manuscript where items are reported   |
|---------------------------|----------|--------------------------------------------------------------------------------------------------------------------------------------------------------------------------------------------|-------------------------------------------------|---------------------------------------------------------------------------------------------------------------------------------------------------------------------------------------------------------------------------------------------------------------------------------------------------------------------------------------------------------------------------------------------------------------------------------------------|---------------------------------------------------|
| <b>Title and abstract</b> |          |                                                                                                                                                                                            |                                                 |                                                                                                                                                                                                                                                                                                                                                                                                                                             |                                                   |
|                           | 1        | (a) Indicate the study's design with a commonly used term in the title or the abstract (b) Provide in the abstract an informative and balanced summary of what was done and what was found | A: Title and abstract<br>B: Abstract            | RECORD 1.1: The type of data used should be specified in the title or abstract. When possible, the name of the databases used should be included.<br><br>RECORD 1.2: If applicable, the geographic region and timeframe within which the study took place should be reported in the title or abstract.<br><br>RECORD 1.3: If linkage between databases was conducted for the study, this should be clearly stated in the title or abstract. | 1.1: Abstract<br><br>1.2: Abstract<br><br>1.3: NA |
| <b>Introduction</b>       |          |                                                                                                                                                                                            |                                                 |                                                                                                                                                                                                                                                                                                                                                                                                                                             |                                                   |
| Background rationale      | 2        | Explain the scientific background and rationale for the investigation being reported                                                                                                       |                                                 |                                                                                                                                                                                                                                                                                                                                                                                                                                             | Lines 129 – 151                                   |
| Objectives                | 3        | State specific objectives, including any prespecified hypotheses                                                                                                                           |                                                 |                                                                                                                                                                                                                                                                                                                                                                                                                                             | Lines 151 - 155                                   |
| <b>Methods</b>            |          |                                                                                                                                                                                            |                                                 |                                                                                                                                                                                                                                                                                                                                                                                                                                             |                                                   |
| Study Design              | 4        | Present key elements of study design early in the paper                                                                                                                                    |                                                 |                                                                                                                                                                                                                                                                                                                                                                                                                                             | Line 152; lines 157-165                           |
| Setting                   | 5        | Describe the setting, locations, and relevant dates, including periods of recruitment, exposure, follow-up, and data collection                                                            |                                                 |                                                                                                                                                                                                                                                                                                                                                                                                                                             | Lines 157 - 201                                   |

|                                                                                                                                                                                                            |          |                                                                                                                                                                                                                                                                                                                                                                                                                                                                                                                                                                                                                                                                                                                        |                                                      |                                                                                                                                                                                                                                                                                                                                                                                                                                                                                                                                                                                                                                                                                                      |                                                                             |
|------------------------------------------------------------------------------------------------------------------------------------------------------------------------------------------------------------|----------|------------------------------------------------------------------------------------------------------------------------------------------------------------------------------------------------------------------------------------------------------------------------------------------------------------------------------------------------------------------------------------------------------------------------------------------------------------------------------------------------------------------------------------------------------------------------------------------------------------------------------------------------------------------------------------------------------------------------|------------------------------------------------------|------------------------------------------------------------------------------------------------------------------------------------------------------------------------------------------------------------------------------------------------------------------------------------------------------------------------------------------------------------------------------------------------------------------------------------------------------------------------------------------------------------------------------------------------------------------------------------------------------------------------------------------------------------------------------------------------------|-----------------------------------------------------------------------------|
| <p>1<br/>2<br/>3<br/>4<br/>5<br/>6<br/>7<br/>8<br/>9<br/>10<br/>11<br/>12<br/>13<br/>14<br/>15<br/>16<br/>17<br/>18<br/>19<br/>20<br/>21<br/>22<br/>23<br/>24<br/>25<br/>26<br/>27</p> <p>Participants</p> | <p>6</p> | <p>(a) <i>Cohort study</i> - Give the eligibility criteria, and the sources and methods of selection of participants. Describe methods of follow-up<br/> <i>Case-control study</i> - Give the eligibility criteria, and the sources and methods of case ascertainment and control selection. Give the rationale for the choice of cases and controls<br/> <i>Cross-sectional study</i> - Give the eligibility criteria, and the sources and methods of selection of participants</p> <p>(b) <i>Cohort study</i> - For matched studies, give matching criteria and number of exposed and unexposed<br/> <i>Case-control study</i> - For matched studies, give matching criteria and the number of controls per case</p> | <p>A: Lines 157 – 219<br/>                 B: NA</p> | <p>RECORD 6.1: The methods of study population selection (such as codes or algorithms used to identify subjects) should be listed in detail. If this is not possible, an explanation should be provided.</p> <p>RECORD 6.2: Any validation studies of the codes or algorithms used to select the population should be referenced. If validation was conducted for this study and not published elsewhere, detailed methods and results should be provided.</p> <p>RECORD 6.3: If the study involved linkage of databases, consider use of a flow diagram or other graphical display to demonstrate the data linkage process, including the number of individuals with linked data at each stage.</p> | <p>6.1: Lines 157 – 181</p> <p>6.3: References 20 and 21</p> <p>6.3: NA</p> |
| <p>28<br/>29<br/>30<br/>31<br/>32<br/>33<br/>34</p> <p>Variables</p>                                                                                                                                       | <p>7</p> | <p>Clearly define all outcomes, exposures, predictors, potential confounders, and effect modifiers. Give diagnostic criteria, if applicable.</p>                                                                                                                                                                                                                                                                                                                                                                                                                                                                                                                                                                       | <p>Lines 166 – 196; References 20 and 21</p>         | <p>RECORD 7.1: A complete list of codes and algorithms used to classify exposures, outcomes, confounders, and effect modifiers should be provided. If these cannot be reported, an explanation should be provided.</p>                                                                                                                                                                                                                                                                                                                                                                                                                                                                               | <p>7.1: Lines 166 – 196; References 20 and 21</p>                           |
| <p>35<br/>36<br/>37<br/>38<br/>39<br/>40<br/>41<br/>42</p> <p>Data sources/<br/>measurement</p>                                                                                                            | <p>8</p> | <p>For each variable of interest, give sources of data and details of methods of assessment (measurement). Describe comparability of assessment methods if there is more than one group</p>                                                                                                                                                                                                                                                                                                                                                                                                                                                                                                                            | <p>Lines 157 - 219</p>                               |                                                                                                                                                                                                                                                                                                                                                                                                                                                                                                                                                                                                                                                                                                      |                                                                             |

|                                                                                                                                              |                                  |    |                                                                                                                                                                                                                                                                                                                                                                                                                                                                                                                                                                      |                                                                                  |                                                                                                                                                       |                       |
|----------------------------------------------------------------------------------------------------------------------------------------------|----------------------------------|----|----------------------------------------------------------------------------------------------------------------------------------------------------------------------------------------------------------------------------------------------------------------------------------------------------------------------------------------------------------------------------------------------------------------------------------------------------------------------------------------------------------------------------------------------------------------------|----------------------------------------------------------------------------------|-------------------------------------------------------------------------------------------------------------------------------------------------------|-----------------------|
| 1<br>2<br>3<br>4<br>5<br>6<br>7<br>8<br>9<br>10                                                                                              | Bias                             | 9  | Describe any efforts to address potential sources of bias                                                                                                                                                                                                                                                                                                                                                                                                                                                                                                            | Lines 157 - 219                                                                  |                                                                                                                                                       |                       |
| 11<br>12<br>13<br>14<br>15<br>16<br>17<br>18<br>19<br>20<br>21<br>22<br>23<br>24<br>25<br>26<br>27<br>28<br>29<br>30<br>31<br>32<br>33<br>34 | Study size                       | 10 | Explain how the study size was arrived at                                                                                                                                                                                                                                                                                                                                                                                                                                                                                                                            | Lines 157 - 165                                                                  |                                                                                                                                                       |                       |
| 35<br>36<br>37<br>38<br>39<br>40<br>41<br>42<br>43<br>44                                                                                     | Quantitative variables           | 11 | Explain how quantitative variables were handled in the analyses. If applicable, describe which groupings were chosen, and why                                                                                                                                                                                                                                                                                                                                                                                                                                        | Lines 167 - 225                                                                  |                                                                                                                                                       |                       |
| 45<br>46<br>47                                                                                                                               | Statistical methods              | 12 | (a) Describe all statistical methods, including those used to control for confounding<br>(b) Describe any methods used to examine subgroups and interactions<br>(c) Explain how missing data were addressed<br>(d) <i>Cohort study</i> - If applicable, explain how loss to follow-up was addressed<br><i>Case-control study</i> - If applicable, explain how matching of cases and controls was addressed<br><i>Cross-sectional study</i> - If applicable, describe analytical methods taking account of sampling strategy<br>(e) Describe any sensitivity analyses | A: Lines 203 - 225<br>B: NA<br>C: Lines 164 – 165<br>D: Lines 203 – 219<br>E. NA |                                                                                                                                                       |                       |
|                                                                                                                                              | Data access and cleaning methods |    | ..                                                                                                                                                                                                                                                                                                                                                                                                                                                                                                                                                                   |                                                                                  | RECORD 12.1: Authors should describe the extent to which the investigators had access to the database population used to create the study population. | 12.1: Lines 157 – 165 |



|                  |    |                                                                                                                                                                                                                                                                                                                                                 |                                                         |                                                                                                                                                                                                                                                                                                                    |                       |
|------------------|----|-------------------------------------------------------------------------------------------------------------------------------------------------------------------------------------------------------------------------------------------------------------------------------------------------------------------------------------------------|---------------------------------------------------------|--------------------------------------------------------------------------------------------------------------------------------------------------------------------------------------------------------------------------------------------------------------------------------------------------------------------|-----------------------|
|                  |    |                                                                                                                                                                                                                                                                                                                                                 |                                                         | RECORD 12.2: Authors should provide information on the data cleaning methods used in the study.                                                                                                                                                                                                                    | 12.2: Lines 167 - 196 |
| Linkage          |    | ..                                                                                                                                                                                                                                                                                                                                              |                                                         | RECORD 12.3: State whether the study included person-level, institutional-level, or other data linkage across two or more databases. The methods of linkage and methods of linkage quality evaluation should be provided.                                                                                          | 12.3: NA              |
| <b>Results</b>   |    |                                                                                                                                                                                                                                                                                                                                                 |                                                         |                                                                                                                                                                                                                                                                                                                    |                       |
| Participants     | 13 | (a) Report the numbers of individuals at each stage of the study ( <i>e.g.</i> , numbers potentially eligible, examined for eligibility, confirmed eligible, included in the study, completing follow-up, and analysed)<br>(b) Give reasons for non-participation at each stage.<br>(c) Consider use of a flow diagram                          | A: Lines 164 – 165<br>B: NA<br>C: NA                    | RECORD 13.1: Describe in detail the selection of the persons included in the study ( <i>i.e.</i> , study population selection) including filtering based on data quality, data availability and linkage. The selection of included persons can be described in the text and/or by means of the study flow diagram. | 13.1: Lines 157 - 165 |
| Descriptive data | 14 | (a) Give characteristics of study participants ( <i>e.g.</i> , demographic, clinical, social) and information on exposures and potential confounders<br>(b) Indicate the number of participants with missing data for each variable of interest<br>(c) <i>Cohort study</i> - summarise follow-up time ( <i>e.g.</i> , average and total amount) | A: Table 1<br>B: Lines 164 – 165, Table 1<br>C: Table 1 |                                                                                                                                                                                                                                                                                                                    |                       |
| Outcome data     | 15 | <i>Cohort study</i> - Report numbers of outcome events or summary measures over time<br><i>Case-control study</i> - Report numbers in each exposure                                                                                                                                                                                             | Figure 1, Tables 2 and 3                                |                                                                                                                                                                                                                                                                                                                    |                       |

|                   |    |                                                                                                                                                                                                                                                                                                                                                                                                                 |                                      |                                                                                                                                                                                                                                                                                                          |                       |
|-------------------|----|-----------------------------------------------------------------------------------------------------------------------------------------------------------------------------------------------------------------------------------------------------------------------------------------------------------------------------------------------------------------------------------------------------------------|--------------------------------------|----------------------------------------------------------------------------------------------------------------------------------------------------------------------------------------------------------------------------------------------------------------------------------------------------------|-----------------------|
|                   |    | category, or summary measures of exposure<br><i>Cross-sectional study</i> - Report numbers of outcome events or summary measures                                                                                                                                                                                                                                                                                |                                      |                                                                                                                                                                                                                                                                                                          |                       |
| Main results      | 16 | (a) Give unadjusted estimates and, if applicable, confounder-adjusted estimates and their precision (e.g., 95% confidence interval). Make clear which confounders were adjusted for and why they were included<br>(b) Report category boundaries when continuous variables were categorized<br>(c) If relevant, consider translating estimates of relative risk into absolute risk for a meaningful time period | A: Table 4<br>B: Tables 1-5<br>C: NA |                                                                                                                                                                                                                                                                                                          |                       |
| Other analyses    | 17 | Report other analyses done— e.g., analyses of subgroups and interactions, and sensitivity analyses                                                                                                                                                                                                                                                                                                              | Lines 203 - 225                      |                                                                                                                                                                                                                                                                                                          |                       |
| <b>Discussion</b> |    |                                                                                                                                                                                                                                                                                                                                                                                                                 |                                      |                                                                                                                                                                                                                                                                                                          |                       |
| Key results       | 18 | Summarise key results with reference to study objectives                                                                                                                                                                                                                                                                                                                                                        | Lines 308 - 329                      |                                                                                                                                                                                                                                                                                                          |                       |
| Limitations       | 19 | Discuss limitations of the study, taking into account sources of potential bias or imprecision. Discuss both direction and magnitude of any potential bias                                                                                                                                                                                                                                                      | Lines 359 - 388                      | RECORD 19.1: Discuss the implications of using data that were not created or collected to answer the specific research question(s). Include discussion of misclassification bias, unmeasured confounding, missing data, and changing eligibility over time, as they pertain to the study being reported. | 19.1: Lines 359 - 388 |
| Interpretation    | 20 | Give a cautious overall interpretation of results considering objectives,                                                                                                                                                                                                                                                                                                                                       | Lines 308 - 388                      |                                                                                                                                                                                                                                                                                                          |                       |

|                                                           |    |                                                                                                                                                               |                 |                                                                                                                                                          |                |
|-----------------------------------------------------------|----|---------------------------------------------------------------------------------------------------------------------------------------------------------------|-----------------|----------------------------------------------------------------------------------------------------------------------------------------------------------|----------------|
|                                                           |    | limitations, multiplicity of analyses, results from similar studies, and other relevant evidence                                                              |                 |                                                                                                                                                          |                |
| Generalisability                                          | 21 | Discuss the generalisability (external validity) of the study results                                                                                         | Lines 359 - 388 |                                                                                                                                                          |                |
| <b>Other Information</b>                                  |    |                                                                                                                                                               |                 |                                                                                                                                                          |                |
| Funding                                                   | 22 | Give the source of funding and the role of the funders for the present study and, if applicable, for the original study on which the present article is based | Lines 22 - 26   |                                                                                                                                                          |                |
| Accessibility of protocol, raw data, and programming code |    | ..                                                                                                                                                            | Line 231.       | RECORD 22.1: Authors should provide information on how to access any supplemental information such as the study protocol, raw data, or programming code. | 22.1: Line 231 |

\*Reference: Benchimol EI, Smeeth L, Guttman A, Harron K, Moher D, Petersen I, Sørensen HT, von Elm E, Langan SM, the RECORD Working Committee. The REporting of studies Conducted using Observational Routinely-collected health Data (RECORD) Statement. *PLoS Medicine* 2015; in press.

\*Checklist is protected under Creative Commons Attribution ([CC BY](https://creativecommons.org/licenses/by/4.0/)) license.
